# Supplementary material for: Loss of inner kinetochore genes is associated with the transition to an unconventional point centromere in budding yeast
Source: PeerJ. 2020 Sep 29;8:e10085. doi: 10.7717/peerj.10085 (PMC7531349; doi:10.7717/peerj.10085)
Supplement: Supplemental Information 1 — The gene presence/absence matrix across 20 yeast species has been downloaded from YGOB database for kinetochore genes. Genes missing in both copies for Post-WGD species are colored red, missing in Pre-WGD species are colored orange, genes with both copies present in Post-WGD are colored olive green, genes missing one of the copies are colored light blue and genes present in pre-WGD species are colored light green. [file peerj-08-10085-s001.xlsx]

## Sheet: Kinetochore_genes
---	Missing in both copies (Post-WGD)
---	Missing (Pre-WGD)
	Two copies in Post-WGD
---	Missing in one copy (Post-WGD)
	Present (Pre-WGD)
Gene stable ID	Gene name		Ancestral Gene Order	C. glabrata Position 1	C. glabrata Position 2	E. cymbalariae	E. gossypii	K. africana Position 1	K. africana Position 2	K. lactis	K. naganishii Position 1	K. naganishii Position 2	L. kluyveri	L. thermotolerans	L. waltii	N. castellii Position 1	N. castellii Position 2	N. dairenensis Position 1	N. dairenensis Position 2	S. bayanus var. uvarum Position 1	S. bayanus var. uvarum Position 2	S. cerevisiae Position 1	S. cerevisiae Position 2	S. kudriavzevii Position 1	S. kudriavzevii Position 2	S. mikatae Position 1	S. mikatae Position 2	T. blattae Position 1	T. blattae Position 2	T. delbrueckii	T. phaffii Position 1	T. phaffii Position 2	V. polyspora Position 1	V. polyspora Position 2	Z. rouxii
YAL034W-A		MTW1	Anc_7.53	CAGL0M11924g	---	Ecym_5054	ADR367C	KAFR0K00550	---	KLLA0F02343g	KNAG0D04960	---	SAKL0B10604g	KLTH0D01738g	Kwal_26.7007	NCAS0F00740	---	NDAI0H01180	---	Suva_1.31	---	YAL034W-A	---	Skud_1.26	---	Smik_1.31	---	TBLA0E01920	---	TDEL0H03980	TPHA0N00420	---	Kpol_1065.11	---	ZYRO0D04488g
YBL034C		STU1	Anc_3.321	CAGL0F04301g	---	Ecym_7447	ADL298C	KAFR0H01130	---	KLLA0B12331g	KNAG0H00890	---	SAKL0B06864g	KLTH0E14586g	Kwal_27.12498	NCAS0A10920	---	NDAI0A05380	---	Suva_2.85	---	YBL034C	---	Skud_2.69	---	Smik_2.81	---	TBLA0B02650	---	TDEL0F01520	TPHA0M01390	---	---	Kpol_264.1	ZYRO0G13178g
YBR107C	IML3	IML3	Anc_3.358	CAGL0K12298g	---	---	---	KAFR0D02720	---	---	KNAG0B01510	---	SAKL0B07766g	KLTH0F10670g	Kwal_23.3739	---	---	---	---	Suva_4.354	---	YBR107C	---	Skud_2.233	---	Smik_2.247	---	TBLA0B02410	---	TDEL0C05000	TPHA0A03580	---	Kpol_1065.19	---	ZYRO0C16302g
YBR156C		SLI15	Anc_8.507	CAGL0H07447g	---	Ecym_2560	AGL269W	KAFR0E02990	---	KLLA0B09944g	KNAG0A03940	---	SAKL0H10912g	KLTH0E11770g	Kwal_27.11892	NCAS0B02390	---	NDAI0C05300	---	Suva_4.407	---	YBR156C	---	Skud_2.283	---	Smik_2.296	---	TBLA0H03390	---	TDEL0B01300	TPHA0L01430	---	Kpol_513.3	---	ZYRO0F08646g
YBR211C		AME1	Anc_6.103	CAGL0K06633g	---	Ecym_3083	AAR150C	KAFR0G02330	---	KLLA0C05500g	KNAG0M00870	---	SAKL0A07392g	KLTH0H06864g	Kwal_14.1859	NCAS0H00800	---	NDAI0D00780	---	Suva_4.469	---	YBR211C	---	Skud_2.344	---	Smik_2.354	---	TBLA0A09900	---	TDEL0G03680	TPHA0B02710	---	Kpol_478.18	---	ZYRO0C05104g
YBR216C		YBP1	Anc_6.112	CAGL0K06743g	CAGL0F06985g	Ecym_3074	AAR159C	KAFR0A04680	KAFR0G02280	KLLA0C05698g	KNAG0M00830	KNAG0F02550	SAKL0A07194g	KLTH0H06666g	Kwal_14.1812	NCAS0D03200	NCAS0H01450	NDAI0F01800	NDAI0I01690	Suva_4.474	Suva_7.211	YBR216C	YGL060W	Skud_7.220	Skud_2.349	Smik_7.220	Smik_2.359	TBLA0A09970	TBLA0F02460	TDEL0G03580	TPHA0J01770	TPHA0B02670	Kpol_534.49	Kpol_461.6	ZYRO0C04884g
YBR233W-A		DAD3	Anc_6.142	CAGL0K07111g	---	Ecym_2275	AFL021C	KAFR0A04490	---	KLLA0F10637g	KNAG0F02360	---	SAKL0A06336g	KLTH0H05984g	Kwal_14.1678	NCAS0D03390	---	NDAI0I01450	---	Suva_4.490	---	YBR233W-A	---	Skud_2.365	---	Smik_2.376	---	TBLA0A01490	---	TDEL0A01660	TPHA0J01950	---	Kpol_1002.95	---	ZYRO0C14740g
YCL029C		BIK1	Anc_1.46	CAGL0B00924g	---	Ecym_1052	AFR702W	KAFR0D00430	---	KLLA0C01474g	KNAG0C00520	---	SAKL0C01496g	KLTH0F01452g	Kwal_33.13186	NCAS0B08810	---	NDAI0A00460	---	Suva_3.184	---	YCL029C	---	Skud_3.33	---	Smik_3.48	---	TBLA0A07320	---	TDEL0C06560	TPHA0E03680	---	Kpol_2002.41	---	ZYRO0F17556g
YCR077C		PAT1	Anc_6.350	CAGL0M07029g	---	Ecym_2509	AGL220W	KAFR0F04290	---	KLLA0F27357g	KNAG0I02770	---	SAKL0A01034g	KLTH0A06974g	Kwal_23.6358	NCAS0D04840	---	NDAI0I00140	---	Suva_3.115	---	YCR077C	---	Skud_3.151	---	Smik_3.178	---	TBLA0F04170	---	TDEL0A07650	TPHA0M01900	---	Kpol_1028.33	---	ZYRO0D07964g
YCR086W		CSM1	Anc_6.364	CAGL0E00539g	---	Ecym_2524	AGL235C	KAFR0J02670	---	KLLA0F10241g	KNAG0I02720	---	SAKL0A00638g	KLTH0A07304g	Kwal_23.6435	NCAS0D04770	---	NDAI0I00200	---	Suva_3.122	---	YCR086W	---	Skud_3.157	---	Smik_3.184	---	TBLA0F00530	---	TDEL0A07790	TPHA0M02020	---	Kpol_1028.22	---	ZYRO0D17314g
YDL028C		MPS1	Anc_3.162	CAGL0K01617g	---	Ecym_5236	ADR317C	KAFR0F02220	---	KLLA0C03828g	KNAG0K01740	---	SAKL0C07348g	KLTH0F06468g	Kwal_33.14167	NCAS0C03560	NCAS0I02080	---	NDAI0A06620	Suva_4.221	---	YDL028C	---	Skud_4.223	---	Smik_4.207	---	TBLA0F00860	---	TDEL0D04600	TPHA0M00300	---	Kpol_1032.10	---	ZYRO0B04906g
YDR016C		DAD1	Anc_3.239	CAGL0D04394g	---	Ecym_6032	AAR185W	KAFR0E01120	---	KLLA0B06974g	KNAG0H01410	---	SAKL0D04268g	KLTH0C08206g	Kwal_56.22920	NCAS0A10380	---	NDAI0A05910	---	Suva_2.166	---	YDR016C	---	Skud_4.268	---	Smik_4.250	---	TBLA0I01810	---	TDEL0D03860	TPHA0A04140	---	Kpol_1037.55	---	ZYRO0A03696g
YDR130C		FIN1	Anc_8.297	CAGL0B02057g	---	Ecym_4271	AGR051W	KAFR0B05600	---	KLLA0F19921g	---	---	SAKL0H16170g	KLTH0G12848g	Kwal_56.23633	NCAS0B03670	---	NDAI0J01110	---	Suva_2.293	---	YDR130C	---	Skud_4.391	---	Smik_4.376	---	---	TBLA0H01360	TDEL0F04240	TPHA0C00980	---	Kpol_1033.26	---	ZYRO0D06336g
YDR201W		SPC19	Anc_8.409	CAGL0F05467g	---	Ecym_4158	AGL105W	KAFR0B06230	---	KLLA0D18821g	KNAG0A04600	---	SAKL0H13420g	KLTH0F08228g	Kwal_23.3212	NCAS0B02970	---	NDAI0C04740	---	Suva_2.368	---	YDR201W	---	Skud_4.464	---	Smik_4.448	---	TBLA0H00790	---	TDEL0F05330	TPHA0C02260	---	Kpol_1064.57	---	ZYRO0C04532g
YDR254W		CHL4	Anc_8.492	CAGL0B02673g	---	Ecym_2542	AGL251C	KAFR0E02910	---	KLLA0D11770g	KNAG0A04020	---	SAKL0H11308g	KLTH0E11440g	Kwal_27.11838	---	---	---	---	Suva_2.420	---	YDR254W	---	Skud_4.516	---	Smik_4.501	---	TBLA0A01560	---	TDEL0B01450	TPHA0L01360	---	Kpol_1031.77	---	ZYRO0F08316g
YDR318W		MCM21	Anc_5.349	CAGL0H07139g	---	Ecym_8184	AGR349W	KAFR0C01870	---	KLLA0B10142g	KNAG0C05520	---	SAKL0G08888g	KLTH0H14806g	Kwal_34.15986	NCAS0F02850	---	NDAI0I01550	---	Suva_2.487	---	YDR318W	---	Skud_4.584	---	Smik_4.577	---	TBLA0H01980	---	TDEL0E02780	TPHA0D02070	---	Kpol_1051.5	---	ZYRO0D10120g
YDR320C-A		DAD4	Anc_5.354	CAGL0H07073g	---	Ecym_8178	AGR355C	KAFR0C01830	---	KLLA0C16775g	KNAG0C05480	---	SAKL0G08778g	KLTH0H14916g	Kwal_34.15975	NCAS0F02880	---	NDAI0C04330	---	Suva_2.490	---	YDR320C-A	---	Skud_4.587	---	Smik_4.580	---	TBLA0A03130	---	TDEL0E02730	TPHA0E01100	---	Kpol_339.14	---	ZYRO0D10230g
YDR328C		SKP1	Anc_5.371	CAGL0M01364g	---	Ecym_8162	ADR295C	KAFR0D04400	---	KLLA0E16941g	KNAG0C05390	---	SAKL0G08382g	KLTH0E03784g	Kwal_55.20211	NCAS0F02970	---	NDAI0C04420	---	Suva_2.498	---	YDR328C	---	Skud_4.595	---	Smik_4.588	---	TBLA0H01860	---	TDEL0E02570	TPHA0D02190	---	Kpol_1055.6	---	ZYRO0D10384g
YDR374W-A	WIP1	WIP1	Anc_5.447	Cgla_YGOB_YDR374W-A	---	---	Agos_YGOB_YDR374W-A	---	---	KLLA0E02465g	---	---	Sklu_YGOB_YDR374W-A	Kthe_YGOB_YDR374W-A	Kwal_YGOB_YDR374W-A	NCAS0A11780	---	NDAI0A04510	---	Suva_2.547	---	YDR374W-A	---	Skud_4.644	---	Smik_4.642	---	---	---	TDEL0D02540	TPHA0E01670	---	---	---	ZYRO0G01694g
YDR383C	NKP1	NKP1	Anc_5.463	CAGL0A03190g	---	---	---	KAFR0E03690	---	KLLA0E02883g	KNAG0C04700	---	SAKL0G03190g	KLTH0F15356g	Kwal_55.21322	---	---	---	---	Suva_2.558	---	YDR383C	---	Skud_4.655	---	Smik_4.653	---	TBLA0A08000	---	TDEL0A03270	TPHA0E01560	---	Kpol_543.1	---	ZYRO0B02420g
YDR439W		LRS4	Anc_5.553	CAGL0J10560g	---	Ecym_4088	AER329C	KAFR0I00870	---	KLLA0B01221g	KNAG0C03080	---	SAKL0G05500g	KLTH0G04356g	Kwal_47.18517	NCAS0F01210	---	NDAI0H01260	---	Suva_2.614	---	YDR439W	---	Skud_4.712	---	Smik_4.711	---	TBLA0D01460	---	TDEL0A04160	TPHA0D02520	---	Kpol_1004.41	---	ZYRO0D13134g
YDR532C		KRE28	Anc_1.19	CAGL0H01573g	---	---	AFR728W	KAFR0H03720	---	KLLA0C00891g	KNAG0F00130	---	SAKL0C00836g	KLTH0F00836g	Kwal_33.13074	NCAS0A00230	---	NDAI0F04590	---	Suva_2.714	---	YDR532C	---	Skud_4.806	---	Smik_4.813	---	TBLA0A07430	---	TDEL0C06840	TPHA0E03880	---	Kpol_2002.21	---	ZYRO0F18172g
YEL061C		CIN8	Anc_6.16	CAGL0B03641g	---	Ecym_3020	ACR010C	KAFR0L00370	---	KLLA0D01045g	KNAG0M01130	---	SAKL0E01078g	KLTH0C11330g	Kwal_56.22403	NCAS0H00880	---	NDAI0D00870	---	Suva_5.6	---	YEL061C	---	Skud_5.28	---	Smik_5.26	---	TBLA0A07230	---	TDEL0G04530	TPHA0J00300	TPHA0M00240	Kpol_1032.6	Kpol_1045.73	ZYRO0C07898g
YER016W		BIM1	Anc_7.167	CAGL0H09438g	---	Ecym_1259	AAR024W	KAFR0G02790	---	KLLA0B11550g	KNAG0L01050	---	SAKL0F03916g	KLTH0F13882g	Kwal_55.21049	NCAS0E02030	---	NDAI0E03590	---	Suva_5.108	---	YER016W	---	Skud_5.120	---	Smik_5.137	---	TBLA0D04480	---	TDEL0H02780	TPHA0C01530	---	Kpol_401.2	---	ZYRO0D15268g
YER018C		SPC25	Anc_1.71	CAGL0M11858g	---	Ecym_1076	AFR679C	KAFR0D00640	---	KLLA0C02079g	KNAG0C00720	---	SAKL0C02332g	KLTH0F02112g	Kwal_33.13338	NCAS0B08730	---	NDAI0A00530	---	Suva_5.110	---	YER018C	---	Skud_5.122	---	Smik_5.139	---	TBLA0A05340	---	TDEL0C06310	TPHA0B04590	---	Kpol_2000.75	---	ZYRO0F16962g
YER106W		MAM1	Anc_7.402	CAGL0G03377g	---	---	AGL304W	KAFR0K01890	---	KLLA0E20637g	KNAG0C03500	---	SAKL0F12716g	KLTH0C06446g	Kwal_27.10796	NCAS0A14460	---	NDAI0A01570	---	Suva_5.227	---	YER106W	---	Skud_5.231	---	Smik_5.252	---	TBLA0I00370	---	TDEL0C01450	TPHA0E00790	---	Kpol_1018.101	---	ZYRO0B03586g
YER133W		GLC7	Anc_8.159	CAGL0K02079g	---	Ecym_2341	AFR166C	KAFR0B02190	---	KLLA0F12496g	KNAG0D02080	---	SAKL0H25278g	KLTH0E06314g	Kwal_55.20745	NCAS0B04450	---	NDAI0B01900	---	Suva_5.254	---	YER133W	---	Skud_5.245	---	Smik_5.279	---	TBLA0A08840	---	TDEL0B04530	TPHA0H00280	---	Kpol_495.3	---	ZYRO0G19492g
YFR046C		CNN1	Anc_3.559	CAGL0C01991g	---	Ecym_2588	AFR256C	KAFR0J00200	---	KLLA0A00913g	KNAG0D02930	---	SAKL0F01012g	KLTH0G00902g	Kwal_47.19240	NCAS0F03940	---	NDAI0B06250	---	Suva_12.11	---	YFR046C	---	Skud_6.137	---	Smik_7.366	---	---	---	TDEL0D06270	TPHA0N01270	---	Kpol_460.17	---	ZYRO0E09350g
YGL061C		DUO1	Anc_6.114	CAGL0F06963g	---	Ecym_3072	AAR161W	KAFR0A04670	---	KLLA0C05742g	KNAG0F02540	---	SAKL0A07150g	KLTH0H06622g	Kwal_14.1809	NCAS0D03190	---	NDAI0I01700	---	Suva_7.210	---	YGL061C	---	Skud_7.219	---	Smik_7.219	---	TBLA0F02470	---	TDEL0G03560	TPHA0J01780	---	Kpol_461.5	---	ZYRO0C04840g
YGL086W		MAD1	Anc_6.188	CAGL0H03179g	---	---	AFL065C	KAFR0C02150	---	KLLA0E19141g	KNAG0F02120	---	SAKL0A05170g	KLTH0H04774g	Kwal_27.11183	NCAS0D03670	---	NDAI0I01220	---	Suva_7.183	---	YGL086W	---	Skud_7.196	---	Smik_7.197	---	TBLA0B05160	---	TDEL0G01570	TPHA0J02260	---	Kpol_1002.64	Kpol_1033.33	ZYRO0G08250g
YGL093W		SPC105	Anc_6.179	CAGL0H03047g	---	Ecym_2237	AFL058C	KAFR0C02080	---	KLLA0E18943g	KNAG0F02180	---	SAKL0A05368g	KLTH0H04994g	Kwal_27.11131	NCAS0D03610	---	NDAI0I01280	---	Suva_7.176	---	YGL093W	---	Skud_7.189	---	Smik_7.190	---	TBLA0B05230	---	TDEL0G01660	TPHA0J02180	---	Kpol_1002.72	---	ZYRO0G08052g
YGR113W		DAM1	Anc_3.458	CAGL0L04752g	---	Ecym_1254	AAR029W	KAFR0C02350	---	KLLA0B11429g	KNAG0B00920	---	SAKL0F03806g	KLTH0F13992g	Kwal_55.21080	NCAS0E00890	---	NDAI0G01060	---	Suva_7.398	---	YGR113W	---	Skud_7.418	---	Smik_6.203	---	TBLA0C03860	---	TDEL0F03430	TPHA0D04090	---	Kpol_1050.91	---	ZYRO0C06402g
YGR140W		CBF2	Anc_3.504	CAGL0I10318g	---	Ecym_1226	AFR323W	KAFR0C02040	---	KLLA0E03807g	KNAG0B00720	---	SAKL0F02420g	KLTH0G02244g	Kwal_47.18929	NCAS0E00730	---	NDAI0I02760	---	Suva_7.427	---	YGR140W	---	Skud_7.450	---	Smik_6.235	---	TBLA0D02880	---	TDEL0D05720	TPHA0D03320	---	Kpol_YGOB_1017.2	---	ZYRO0G19624g
YGR179C		OKP1	Anc_5.181	CAGL0G04191g	---	Ecym_6013	AAL138C	KAFR0D01750	---	KLLA0F15136g	KNAG0H02630	---	SAKL0G13354g	KLTH0B03872g	Kwal_33.15024	NCAS0A06900	---	NDAI0D01960	---	Suva_7.472	---	YGR179C	---	Skud_7.509	---	Smik_6.293	---	TBLA0H02150	---	TDEL0E04470	TPHA0E03190	---	Kpol_2002.87	---	ZYRO0B10978g
YGR188C		BUB1	Anc_5.162	CAGL0G06930g	CAGL0I08899g	Ecym_8210	AGR315C	KAFR0J00550	KAFR0K00880	KLLA0F22605g	KNAG0B04970	KNAG0E03740	SAKL0G13882g	KLTH0B02178g	Kwal_33.15381	NCAS0A07080	NCAS0D01920	NDAI0C03060	NDAI0D02140	Suva_7.481	Suva_12.64	YGR188C	YJL013C	Skud_7.518	Skud_10.204	Smik_10.256	Smik_6.306	TBLA0B06620	---	TDEL0E04680	TPHA0J03180	---	Kpol_538.20	---	ZYRO0G12232g
YGR218W		CRM1	Anc_5.111	CAGL0B02189g	CAGL0I01782g	Ecym_2068	ADL128C	KAFR0B04170	KAFR0E02060	KLLA0E16061g	KNAG0A01660	---	SAKL0G15180g	KLTH0C02024g	Kwal_27.9870	NCAS0A07450	NCAS0D01590	NDAI0C03160	NDAI0D02420	Suva_7.513	---	YGR218W	---	Skud_7.555	---	Smik_16.86	---	TBLA0B07490	---	TDEL0G01360	TPHA0A04970	TPHA0H01010	Kpol_1050.49	Kpol_1010.55	ZYRO0B15466g
YHR166C		CDC23	Anc_5.72	CAGL0I02288g	---	Ecym_5092	ABR206W	KAFR0E02240	---	KLLA0A05258g	KNAG0E00680	---	SAKL0H02244g	KLTH0H00704g	Kwal_56.24750	NCAS0D01390	---	NDAI0C03350	---	Suva_15.366	---	YHR166C	---	Skud_8.230	---	Smik_8.250	---	TBLA0B07970	---	TDEL0G00960	TPHA0A05290	---	Kpol_1050.82	---	ZYRO0C11594g
YIL144W		NDC80	Anc_5.696	CAGL0D02684g	---	Ecym_4024	AFR281C	KAFR0D02270	---	KLLA0E13003g	KNAG0L02080	---	SAKL0E14740g	KLTH0E01188g	Kwal_55.19733	NCAS0G00280	---	NDAI0F00330	---	Suva_9.45	---	YIL144W	---	Skud_9.24	---	Smik_9.25	---	TBLA0I01660	---	TDEL0B02260	TPHA0H01420	---	Kpol_489.8	---	ZYRO0G14652g
YIR010W		DSN1	Anc_7.175	CAGL0L09603g	---	Ecym_4401	AGR247C	KAFR0A02710	---	KLLA0D15741g	KNAG0H02790	---	SAKL0F07018g	KLTH0E04994g	Kwal_55.20451	NCAS0A12440	---	NDAI0B01700	---	Suva_9.221	---	YIR010W	---	Skud_9.188	---	Smik_9.210	---	TBLA0D04510	---	TDEL0H02720	TPHA0C01490	---	Kpol_401.6	---	ZYRO0D15400g
YJL030W		MAD2	Anc_5.244	CAGL0J01089g	---	Ecym_8258	ACR043W	KAFR0J01100	---	KLLA0D09438g	KNAG0I01790	---	SAKL0G11682g	KLTH0G07700g	Kwal_23.2873	NCAS0A01410	---	NDAI0C02330	---	Suva_12.50	---	YJL030W	---	Skud_10.191	---	Smik_10.241	---	TBLA0D03440	---	TDEL0E03820	TPHA0N00970	---	Kpol_1004.17	---	ZYRO0A10736g
YJR060W		CBF1	Anc_1.508	CAGL0H01815g	---	Ecym_3159	AFR414W	KAFR0D03630	---	KLLA0B13761g	KNAG0B00250	---	SAKL0D12650g	KLTH0C02640g	Kwal_27.9999	NCAS0A12210	---	NDAI0A04030	---	Suva_12.149	---	YJR060W	---	Skud_10.284	---	Smik_10.350	---	TBLA0D03730	---	TDEL0F00520	TPHA0F03530	---	Kpol_1054.48	---	ZYRO0G04466g
YJR089W	BIR1	BIR1	Anc_7.460	---	---	Ecym_4672	AER399C	KAFR0G00980	---	KLLA0E06073g	KNAG0D01460	---	SAKL0F14058g	KLTH0F07568g	Kwal_33.14405	NCAS0H00640	---	NDAI0D00570	---	Suva_12.176	---	YJR089W	---	Skud_10.310	---	Smik_10.376	---	TBLA0F00490	---	TDEL0C03240	TPHA0B01390	---	Kpol_520.4	---	---
YJR112W		NNF1	Anc_7.489	CAGL0C04851g	---	Ecym_7179	ABR150C	KAFR0G00810	---	KLLA0E05809g	KNAG0D01250	---	SAKL0F14872g	KLTH0E01628g	Kwal_55.19818	NCAS0H00450	---	NDAI0K02740	---	Suva_12.203	---	YJR112W	---	Skud_10.336	---	Smik_10.405	---	TBLA0E01370	---	TDEL0C03520	TPHA0E00380	---	Kpol_1028.88	---	ZYRO0G18018g
YJR135C		MCM22	Anc_4.366	CAGL0M00440g	---	Ecym_5156	ABL073W	KAFR0E04360	---	KLLA0B04070g	KNAG0B06790	---	SAKL0G18480g	KLTH0D17622g	Kwal_47.16683	NCAS0J02210	---	NDAI0J02930	---	Suva_12.226	---	YJR135C	---	Skud_10.358	---	Smik_10.428	---	TBLA0B09650	---	TDEL0D00500	TPHA0L00220	---	Kpol_1024.6	---	ZYRO0B08580g
YKL049C		CSE4	Anc_2.592	CAGL0M13145g	---	Ecym_2307	ABR083C	KAFR0I01590	---	KLLA0C12529g	KNAG0H00580	---	SAKL0B11198g	KLTH0D08602g	Kwal_26.8328	NCAS0H03050	---	NDAI0C00590	---	Suva_11.177	---	YKL049C	---	Skud_11.180	---	Smik_11.199	---	TBLA0G01890	---	TDEL0B06850	TPHA0N01420	---	Kpol_181.3	---	ZYRO0F01144g
YKL052C		ASK1	Anc_2.588	CAGL0M13079g	---	Ecym_4558	ABR079C	KAFR0I01620	---	KLLA0C12617g	KNAG0A07280	---	SAKL0D14080g	KLTH0D08514g	Kwal_26.8295	NCAS0H03010	---	NDAI0C00640	---	Suva_11.174	---	YKL052C	---	Skud_11.177	---	Smik_11.196	---	TBLA0H02760	---	TDEL0B06810	TPHA0C02630	---	Kpol_1064.13	---	ZYRO0F01232g
YKL089W		MIF2	Anc_2.495	CAGL0M10131g	---	Ecym_2433	ABR015C	KAFR0D03400	---	KLLA0B13629g	KNAG0A06760	---	SAKL0E02354g	KLTH0D05984g	Kwal_26.7855	NCAS0A05040	NCAS0A12340	NDAI0K02090	---	Suva_11.136	---	YKL089W	---	Skud_11.139	---	Smik_11.151	---	TBLA0B05500	---	TDEL0A02710	TPHA0G03300	---	Kpol_1055.23	---	ZYRO0B01144g
YKL138C-A		HSK3	Anc_2.426	---	CAGL0D02018g	Ecym_6093	AFR204W	KAFR0D02910	---	KLLA0E12167g	KNAG0A06150	---	Sklu_YGOB_Anc_2.426	Kthe_YGOB_Anc_2.426	Kwal_YGOB_Anc_2.426	NCAS0A04230	---	NDAI0E01970	---	Suva_11.87	---	YKL138C-A	---	Skud_11.89	---	Smik_11.98	---	TBLA0H00380	---	TDEL0A02020	TPHA0G02810	---	---	Kpol_1018.149	ZYRO0G20284g
YKR037C		SPC34	Anc_1.246	CAGL0L03223g	---	Ecym_8089	AEL315W	KAFR0A03370	---	KLLA0F21428g	KNAG0C01400	---	SAKL0D04774g	KLTH0E15598g	Kwal_27.12673	NCAS0B07860	---	NDAI0B05200	---	Suva_11.269	---	YKR037C	---	Skud_11.272	---	Smik_11.299	---	TBLA0H03070	---	TDEL0D01320	TPHA0B01110	---	Kpol_1031.37	---	ZYRO0D03806g
YKR083C		DAD2	Anc_5.676	CAGL0G02233g	---	Ecym_4044	ADR217C	KAFR0D02090	---	KLLA0A07887g	KNAG0M01870	---	SAKL0G00682g	KLTH0F17820g	Kwal_55.21778	NCAS0A03320	---	NDAI0A03180	---	Suva_11.319	---	YKR083C	---	Skud_11.320	---	Smik_11.346	---	TBLA0A09270	---	TDEL0B02470	TPHA0J01430	---	Kpol_1018.78	---	ZYRO0A11660g
YLR045C		STU2	Anc_5.123	CAGL0M07898g	---	Ecym_2478	ACL132C	KAFR0E02010	---	KLLA0E16325g	KNAG0M01260	---	SAKL0G14850g	KLTH0B01232g	Kwal_33.15528	NCAS0D01670	---	NDAI0C03100	---	Suva_10.129	---	YLR045C	---	Skud_12.111	---	Smik_12.107	---	TBLA0B07540	---	TDEL0E05060	TPHA0H00930	---	Kpol_1010.46	---	ZYRO0F01628g
YLR315W	NKP2	NKP2	Anc_4.132	CAGL0F08591g	---	---	---	KAFR0J01380	---	KLLA0C18425g	KNAG0C05870	---	SAKL0H22726g	Kthe_YGOB_Anc_4.132	Kwal_47.17609	---	---	---	---	Suva_10.412	---	YLR315W	---	Skud_12.400	---	Smik_12.401	---	---	---	TDEL0D03200	TPHA0K01510	---	Kpol_1062.50	---	ZYRO0G10802g
YLR381W		CTF3	Anc_4.235	CAGL0H05027g	---	Ecym_5342	AER042W	KAFR0A06060	---	KLLA0E05347g	KNAG0B05990	---	SAKL0H03366g	KLTH0D14036g	Kwal_23.3485	NCAS0J01370	---	NDAI0J02160	---	Suva_10.498	---	YLR381W	---	Skud_12.466	---	Smik_12.468	---	TBLA0I02870	---	TDEL0E01360	TPHA0B00850	---	Kpol_483.9	---	ZYRO0B12078g
YMR094W		CTF13	Anc_2.467	CAGL0J01243g	---	Ecym_7405	ABL046C	KAFR0A00680	---	KLLA0F13816g	KNAG0E02480	---	SAKL0E03124g	KLTH0D05302g	Kwal_26.7730	NCAS0A07870	---	NDAI0H02230	---	Suva_13.271	---	YMR094W	---	Skud_13.250	---	Smik_13.278	---	TBLA0I01240	---	TDEL0A02430	TPHA0G03080	---	Kpol_467.18	---	ZYRO0G03102g
YMR117C		SPC24	Anc_2.427	CAGL0K03619g	---	Ecym_6094	AFR203C	KAFR0A00500	---	KLLA0E12189g	KNAG0E02300	---	SAKL0E04070g	KLTH0D04378g	Kwal_YGOB_26.7559	NCAS0F01860	---	NDAI0H02720	---	Suva_13.296	---	YMR117C	---	Skud_13.276	---	Smik_13.306	---	TBLA0H00390	---	TDEL0A02030	TPHA0G02820	---	Kpol_YGOB_1018.151	---	ZYRO0G20262g
YMR168C		CEP3	Anc_2.340	CAGL0F07755g	---	Ecym_3382	AFL200W	KAFR0B04830	---	KLLA0D09977g	KNAG0I00780	---	SAKL0E06336g	KLTH0F09702g	Kwal_23.3514	NCAS0D00890	---	NDAI0H03240	---	Suva_13.348	---	YMR168C	---	Skud_13.333	---	Smik_13.373	---	TBLA0B07000	---	TDEL0G02700	TPHA0C03630	---	Kpol_1043.23	---	ZYRO0A07260g
YOL069W		NUF2	Anc_3.149	CAGL0J11572g	---	Ecym_5282	AEL015W	KAFR0C01110	---	KLLA0F22451g	KNAG0K01060	---	SAKL0C08558g	KLTH0C08646g	Kwal_56.22860	NCAS0C03480	---	NDAI0G02820	---	Suva_15.96	---	YOL069W	---	Skud_15.83	---	Smik_15.89	---	TBLA0G03150	---	TDEL0D04730	TPHA0M00410	---	Kpol_1032.20	---	ZYRO0B05192g
YOR014W		RTS1	Anc_7.106	CAGL0F01397g	---	Ecym_2621	AEL333W	KAFR0D01360	---	KLLA0F08085g	KNAG0L00650	---	SAKL0B09416g	KLTH0D02904g	Kwal_26.7226	NCAS0I00590	---	NDAI0A08440	---	Suva_15.191	---	YOR014W	---	Skud_15.180	---	Smik_15.191	---	TBLA0A04800	TBLA0E02140	TDEL0H03450	TPHA0H02550	---	Kpol_206.2	---	ZYRO0G01430g
YOR026W		BUB3	Anc_5.615	CAGL0H08217g	---	Ecym_5584	AEL226W	KAFR0C05880	---	KLLA0A07106g	KNAG0B03210	---	SAKL0G07040g	KLTH0E02134g	Kwal_55.19926	NCAS0A07160	---	NDAI0F00920	---	Suva_8.79	---	YOR026W	---	Skud_15.191	---	Smik_15.204	---	TBLA0E03320	---	TDEL0A04820	TPHA0D02860	---	Kpol_1018.67	---	ZYRO0A05632g
YOR073W		SGO1	Anc_5.677	CAGL0K05445g	---	Ecym_4043	ADR218W	KAFR0D02390	---	KLLA0A07865g	KNAG0L01960	---	SAKL0G00660g	KLTH0F17842g	Kwal_55.21779	NCAS0G00410	---	NDAI0F00460	---	Suva_8.122	---	YOR073W	---	Skud_15.238	---	Smik_15.251	---	TBLA0E00870	---	TDEL0B02460	TPHA0J01440	---	Kpol_1018.79	---	ZYRO0A11682g
YOR195W		SLK19	Anc_8.604	CAGL0I10901g	---	Ecym_7101	AGR229W	KAFR0G02090	---	KLLA0F00770g	KNAG0A03360	---	SAKL0H08426g	KLTH0D09504g	Kwal_26.8487	NCAS0B01800	---	NDAI0C05880	---	Suva_8.251	---	YOR195W	---	Skud_15.362	---	Smik_15.382	---	TBLA0E04060	---	TDEL0A05490	TPHA0A01150	---	Kpol_479.3	---	ZYRO0F10714g
YPL018W		CTF19	Anc_8.63	CAGL0F02035g	---	Ecym_7296	AGL029W	KAFR0D01100	---	KLLA0D07612g	KNAG0L00390	---	SAKL0B02134g	KLTH0A02838g	Kwal_23.5022	NCAS0J00510	---	NDAI0C06390	---	Suva_16.300	---	YPL018W	---	Skud_16.264	---	Smik_16.217	---	TBLA0D02610	---	TDEL0C00890	TPHA0D00560	---	Kpol_1011.8	---	ZYRO0F03718g
YPL204W		HRR25	Anc_6.215	CAGL0H03553g	---	Ecym_2202	AFL091W	KAFR0K00320	KAFR0C02290	KLLA0D03168g	KNAG0D01130	KNAG0F01980	SAKL0A04444g	KLTH0H04158g	Kwal_56.24064	NCAS0A01090	NCAS0D03820	NDAI0F01640	NDAI0I01070	Suva_16.102	---	YPL204W	---	Skud_16.75	---	Smik_6.409	---	TBLA0A02040	TBLA0B05310	TDEL0E05230	TPHA0J02370	TPHA0E02830	Kpol_1002.53	Kpol_1033.51	ZYRO0G08866g
YPL209C		IPL1	Anc_6.222	CAGL0E05720g	---	Ecym_2194	AFL101C	KAFR0K00280	---	KLLA0B02332g	KNAG0D01090	---	SAKL0A04246g	KLTH0H03982g	Kwal_56.24091	NCAS0B04490	---	NDAI0F01600	---	Suva_16.97	---	YPL209C	---	Skud_16.70	---	Smik_6.414	---	TBLA0A02050	---	TDEL0E05310	TPHA0E02820	---	Kpol_1065.3	---	ZYRO0E07018g
YPL233W		NSL1	Anc_6.259	CAGL0E06182g	---	Ecym_2156	AFL140W	KAFR0F01180	---	KLLA0C15939g	KNAG0D00860	---	SAKL0A03410g	KLTH0H03146g	Kwal_56.24265	NCAS0G01240	---	NDAI0F01370	---	Suva_16.73	---	YPL233W	---	Skud_16.45	---	Smik_6.438	---	TBLA0A02210	---	TDEL0A06720	TPHA0E02640	---	Kpol_1060.34	---	ZYRO0E07810g
YPL268W		PLC1	Anc_6.3	CAGL0A01177g	---	Ecym_3005	ACR024W	KAFR0B06460	---	KLLA0D00638g	KNAG0E02820	---	SAKL0E00704g	KLTH0C11660g	Kwal_56.22323	NCAS0D02230	---	NDAI0I02690	---	Suva_16.37	---	YPL268W	---	Skud_16.9	---	Smik_6.476	---	TBLA0A07020	---	TDEL0G04680	TPHA0J00210	---	Kpol_449.13	---	ZYRO0F00352g
YPR046W		MCM16	Anc_7.475	CAGL0H08624g	---	Ecym_7166	AGL319C	KAFR0B00690	---	KLLA0E05523g	KNAG0F03550	---	SAKL0F14476g	KLTH0E01936g	Kwal_55.19903	NCAS0A14840	---	NDAI0J00640	---	Suva_16.375	---	YPR046W	---	Skud_16.333	---	Smik_16.289	---	TBLA0F02640	---	TDEL0C03380	TPHA0E00470	---	Kpol_1028.97	---	ZYRO0G17754g
---	Missing in both copies (Post-WGD)
---	Missing (Pre-WGD)
	Two copies in Post-WGD
---	Missing in one copy (Post-WGD)
	Present (Pre-WGD)

## Sheet: NKP1
V.polyspora B	T.phaffii B	T.blattae B	N.dairenensis B	N.castellii B	K.naganishii B	K.africana B	C.glabrata B	S.uvarum B	S.kudriavzevii B	S.mikatae B	S.cerevisiae B	L.waltii	L.thermotolerans	L.kluyveri	E.cymbalariae	E.gossypii	K.lactis	T.delbrueckii	Z.rouxii	Ancestor	S.cerevisiae A	S.mikatae A	S.kudriavzevii A	S.uvarum A	C.glabrata A	K.africana A	K.naganishii A	N.castellii A	N.dairenensis A	T.blattae A	T.phaffii A	V.polyspora A
---	---	---	NDAI0C01480	---	---	---	---	---	---	---	---	---	---	---	---	---	---	---	---	---	---	---	---	---	---	---	---	---	---	---	---	---
---	TPHA0J02700	TBLA0A02650	---	---	---	---	---	---	---	---	---	Kwal_55.21342	KLTH0F15466g	SAKL0G03080g	---	AFR149C	KLLA0E02751g	TDEL0A03220	ZYRO0B02310g	Anc_5.458	YDR381W	Smik_4.650	Skud_4.652	Suva_2.555	CAGL0A03117g	KAFR0E03720	KNAG0C04740	NCAS0A11840	NDAI0A04440	TBLA0A06405	TPHA0E01590	Kpol_1062.11
---	---	TBLA0A02640	---	---	---	---	---	---	---	---	---	Kwal_55.21341	KLTH0F15444g	SAKL0G03102g	Ecym_4631	AFR148W	KLLA0E02773g	TDEL0A03230	ZYRO0B02332g	Anc_5.459	YDR381C-A	Smik_4.651	Skud_4.653	Suva_2.556	CAGL0A03146g	KAFR0E03710	KNAG0C04730	NCAS0A11850	NDAI0A04430	---	TPHA0E01580	Kpol_1062.10
---	---	---	---	---	---	---	---	---	---	---	---	---	---	---	---	---	KLLA0E02795g	---	---	---	---	---	---	---	---	---	---	---	---	---	---	---
Kpol_440.6	TPHA0J02710	---	---	---	---	---	---	---	---	---	---	Kwal_55.21338	KLTH0F15422g	SAKL0G03124g	Ecym_4630	AFR147C	KLLA0E02817g	TDEL0A03240	ZYRO0B02354g	Anc_5.460	---	---	---	---	---	---	---	---	---	---	---	---
---	---	TBLA0A02630	NDAI0C01470	NCAS0H02170	KNAG0B04110	---	CAGL0K10362g	Suva_8.182	Skud_15.292	Smik_15.308	YOR130C	Kwal_55.21335	KLTH0F15400g	SAKL0G03146g	Ecym_4629	AFR146W	KLLA0E02839g	TDEL0A03250	ZYRO0B02376g	Anc_5.461	---	---	---	---	---	---	KNAG0C04720	NCAS0A11860	NDAI0A04420	---	TPHA0E01570	Kpol_1062.9
---	---	---	---	---	---	---	---	---	---	Smik_15.309	---	---	---	---	---	---	---	---	---	---	---	---	---	---	---	---	---	---	---	---	---	---
---	---	---	---	---	---	---	---	---	---	Smik_15.310	---	---	---	---	---	---	---	---	---	---	---	---	---	---	---	---	---	---	---	---	---	---
---	---	---	---	---	---	---	---	---	Skud_15.293	---	---	---	---	---	---	---	---	---	---	---	---	---	---	---	---	---	---	---	---	---	---	---
---	TPHA0J02720	TBLA0A02620	NDAI0C01460	NCAS0H02180	---	---	---	---	---	---	---	Kwal_55.21333	KLTH0F15378g	SAKL0G03168g	Ecym_4628	AFR145C	KLLA0E02861g	TDEL0A03260	ZYRO0B02398g	Anc_5.462	YDR382W	Smik_4.652	Skud_4.654	Suva_2.557	CAGL0A03168g	KAFR0E03700	KNAG0C04710	NCAS0A11870	---	---	---	---
---	---	---	---	NCAS0H02190	---	---	---	---	---	---	---	---	---	---	---	---	---	---	---	---	---	---	---	---	---	---	---	---	---	---	---	---
---	---	---	---	NCAS0H02200	---	---	---	---	---	---	---	---	---	---	---	---	---	---	---	---	---	---	---	---	---	---	---	---	---	---	---	---
---	---	---	---	---	---	---	---	---	---	---	---	Kwal_55.21322	KLTH0F15356g	SAKL0G03190g	---	---	KLLA0E02883g	TDEL0A03270	ZYRO0B02420g	Anc_5.463	YDR383C	Smik_4.653	Skud_4.655	Suva_2.558	CAGL0A03190g	KAFR0E03690	KNAG0C04700	---	---	TBLA0A08000	TPHA0E01560	Kpol_543.1
---	---	---	---	---	---	---	---	---	---	---	---	---	KLTH0F15334g	---	---	---	---	---	---	---	---	---	---	---	---	---	---	---	---	---	---	---
---	---	TBLA0A02610	---	---	---	---	---	---	---	---	---	Kwal_55.21326	KLTH0F15268g	SAKL0G03278g	Ecym_2321	AFR144W	KLLA0E02905g	TDEL0A03280	ZYRO0B02442g	Anc_5.464	YDR384C	Smik_4.654	Skud_4.656	Suva_2.559	CAGL0A03212g	KAFR0E03680	KNAG0C04690	NCAS0A11880	NDAI0A04410	TBLA0A07990	TPHA0E01550	Kpol_543.2
---	---	---	---	---	---	---	---	---	---	---	---	---	KLTH0F15246g	---	---	---	---	---	---	---	---	---	---	---	---	---	---	---	---	---	---	---
---	---	---	---	---	---	---	---	---	---	---	---	---	---	SAKL0G03300g	---	---	---	---	---	---	---	---	---	---	---	---	---	---	---	---	---	---
---	---	---	---	---	---	---	---	---	---	---	---	Kwal_55.21316	---	SAKL0G03322g	---	---	KLLA0E02927g	---	---	---	---	---	---	---	---	---	---	---	---	---	---	---
---	---	---	NDAI0C01450	NCAS0H02210	KNAG0B04090	---	CAGL0I07315g	Suva_8.184	Skud_15.295	Smik_15.312	YOR131C	Kwal_55.21309	KLTH0F15224g	SAKL0G03344g	---	---	KLLA0E02949g	TDEL0A03290	---	Anc_5.465	---	---	---	---	---	---	---	---	---	---	TPHA0E01540	Kpol_543.3
---	---	---	---	---	---	---	CAGL0I07293g	---	---	---	---	---	---	---	---	---	---	---	---	---	---	---	---	---	---	---	---	---	---	---	---	---
Kpol_440.7	TPHA0J02730	TBLA0A02600	NDAI0C01440	NCAS0H02220	KNAG0B04080	KAFR0B06400	CAGL0I07271g	Suva_8.185	Skud_15.296	Smik_15.313	YOR132W	Kwal_55.21303	KLTH0F15202g	SAKL0G03366g	Ecym_2320	AFR143C	KLLA0E02971g	TDEL0A03300	ZYRO0D11022g	Anc_5.466	---	---	---	---	---	---	---	---	---	---	---	---
Kpol_440.8	TPHA0J02735	TBLA0A02590	NDAI0C01430	NCAS0H02230	---	KAFR0B06390	---	---	Skud_15.298	Smik_15.314	YOR133W	Kwal_55.21295	KLTH0F15180g	SAKL0G03388g	Ecym_2319	AFR142C	KLLA0E02993g	TDEL0A03310	ZYRO0D11044g	Anc_5.467	YDR385W	Smik_4.655	Skud_4.658	Suva_2.560	CAGL0A03234g	KAFR0E03670	KNAG0C04670	NCAS0A11890	NDAI0A04400	TBLA0A07980	TPHA0E01520	Kpol_543.4
---	---	---	---	---	---	---	---	---	---	---	---	---	---	---	---	---	---	---	---	---	---	---	---	---	---	---	---	---	NDAI0A04380	---	---	---
Kpol_440.9	---	TBLA0A02580	---	---	---	---	---	---	---	---	---	Kwal_55.21293	KLTH0F15158g	SAKL0G03410g	Ecym_2318	AFR141C	KLLA0E03015g	TDEL0A03320	ZYRO0D11066g	Anc_5.468	YDR386W	Smik_4.656	Skud_4.659	Suva_2.561	CAGL0A03256g	KAFR0E03660	KNAG0C04660	NCAS0A11900	NDAI0A04370	---	TPHA0E01510	---
---	TPHA0J02740	---	---	---	---	---	---	---	---	---	---	Kwal_55.21289	KLTH0F15136g	SAKL0G03432g	Ecym_2317	---	KLLA0E03037g	TDEL0A03330	ZYRO0D11088g	Anc_5.469	YDR387C	Smik_4.657	Skud_4.660	Suva_2.562	CAGL0M01672g	KAFR0E03650	KNAG0C04620	NCAS0A11910	NDAI0A04360	TBLA0A07970	---	Kpol_543.5
---	Missing in both copies (Post-WGD)
---	Missing in one copy (Post-WGD)
---	Missing (Pre-WGD)
---	Present (Pre-WGD)
---	S. cerevisiae copy
---	Synteny block in N.dairenensis
---	Synteny block in N.castellii
---	Synteny block 2 in N.dairenensis
---	Synteny block 2 in N.castellii

## Sheet: NKP2
V.polyspora B	T.phaffii B	T.blattae B	N.dairenensis B	N.castellii B	K.naganishii B	K.africana B	C.glabrata B	S.uvarum B	S.kudriavzevii B	S.mikatae B	S.cerevisiae B	L.waltii	L.thermotolerans	L.kluyveri	E.cymbalariae	E.gossypii	K.lactis	T.delbrueckii	Z.rouxii	Ancestor	S.cerevisiae A	S.mikatae A	S.kudriavzevii A	S.uvarum A	C.glabrata A	K.africana A	K.naganishii A	N.castellii A	N.dairenensis A	T.blattae A	T.phaffii A	V.polyspora A
---	---	---	---	---	---	---	---	---	---	---	---	---	---	---	---	---	---	---	---	---	---	---	---	---	---	---	---	---	---	TBLA0B10010	---	---
---	---	---	---	---	---	---	---	---	---	---	---	---	---	---	Ecym_8377	ADL040W	---	---	---	---	---	---	---	---	---	---	---	---	---	---	---	---
---	---	---	---	NCAS0A05990	---	KAFR0F03000	CAGL0D06578g	Suva_10.56	Skud_12.49	Smik_12.45	YLL018C-A	---	KLTH0H09372g	SAKL0H24266g	Ecym_8378	ADL041C	KLLA0D03971g	TDEL0F01540	ZYRO0B00572g	Anc_4.43	---	---	---	---	---	---	KNAG0I02990	---	NDAI0D02960	TBLA0B10020	TPHA0K02020	---
---	---	---	---	---	---	---	---	---	---	---	---	---	---	---	Ecym_8379	ADL042W	---	---	---	---	---	---	---	---	---	---	---	---	---	---	---	---
---	---	---	---	NCAS0A06000	---	KAFR0F02730	CAGL0D06600g	Suva_10.55	Skud_12.48	Smik_12.44	YLL019C	Kwal_47.17345	KLTH0E07128g	SAKL0H24288g	Ecym_8380	ADL043C	KLLA0F22297g	TDEL0F01550	ZYRO0B00638g	Anc_4.42	---	---	---	---	---	---	KNAG0I03000	---	NDAI0D02970	TBLA0B10030	TPHA0K02030	Kpol_1027.1
---	TPHA0F00370	---	NDAI0H00390	---	KNAG0J02760	---	---	---	---	---	---	Kwal_47.17342	KLTH0E07106g	SAKL0H24310g	Ecym_8381	ADL044W	---	TDEL0F01560	ZYRO0B00682g	Anc_4.41	YLR312C	Smik_12.395	Skud_12.395	Suva_10.407	---	KAFR0I01340	---	NCAS0C05720	---	---	---	---
---	---	---	NDAI0H00380	---	KNAG0J02770	---	---	---	---	---	---	Kwal_14.2165	KLTH0H08624g	SAKL0H20196g	Ecym_8357	ADL023W	KLLA0C17402g	TDEL0F01570	ZYRO0B00704g	Anc_4.40	YLR312W-A	Smik_12.396	Skud_12.396	Suva_10.408	CAGL0E03520g	KAFR0I01350	---	NCAS0C05730	---	TBLA0B10040	TPHA0K02040	Kpol_1027.2
---	---	---	---	---	---	---	---	---	---	---	---	---	---	---	---	---	---	---	---	---	---	Smik_12.397	---	---	---	---	---	---	---	---	---	---
Kpol_1041.1	TPHA0F00360	---	NDAI0H00370	NCAS0A06010	KNAG0J02780	KAFR0F02740	CAGL0D06622g	Suva_10.54	Skud_12.47	Smik_12.43	YLL021W	Kwal_14.2150	KLTH0H08602g	SAKL0H20174g	Ecym_8356	ADL022C	KLLA0C17380g	TDEL0F01580	ZYRO0B00726g	Anc_4.39	YLR313C	Smik_12.399	Skud_12.397	Suva_10.409	CAGL0E03542g	KAFR0I01360	KNAG0I03010	NCAS0C05740	NDAI0D02980	TBLA0B10050	TPHA0K02050	Kpol_1027.3
---	---	---	---	---	---	---	---	---	---	---	---	---	---	SAKL0H20108g	Ecym_7286	AGL041C	KLLA0D04092g	---	ZYRO0B00748g	---	---	---	---	---	---	---	---	---	---	---	---	---
---	---	---	---	---	---	---	---	---	---	---	---	---	---	---	---	---	---	---	---	---	---	---	Skud_12.398	Suva_10.410	---	---	---	---	---	---	---	---
---	---	TBLA0E01550	NDAI0H00360	---	KNAG0J02790	---	---	---	---	---	---	Kwal_14.2144	KLTH0H08514g	SAKL0H20086g	Ecym_6205	AFR111C	KLLA0D04114g	TDEL0F01590	ZYRO0B00770g	Anc_4.38	YLR314C	Smik_12.400	Skud_12.399	Suva_10.411	CAGL0E03564g	KAFR0I01370	---	NCAS0C05750	---	---	TPHA0K02060	Kpol_1027.4
---	---	---	---	---	---	---	CAGL0F08591g	---	---	---	---	Kwal_47.17609	Kthe_YGOB_Anc_4.132	SAKL0H22726g	---	---	KLLA0C18425g	TDEL0D03200	ZYRO0G10802g	Anc_4.132	YLR315W	Smik_12.401	Skud_12.400	Suva_10.412	---	KAFR0J01380	KNAG0C05870	---	---	---	TPHA0K01510	Kpol_1062.50
Kpol_1025.33	TPHA0F00710	---	---	---	---	---	---	---	---	---	---	Kwal_47.17610	KLTH0E08448g	SAKL0H22748g	---	AFR493C	KLLA0C18403g	TDEL0D03190	ZYRO0G10824g	Anc_4.133	YLR316C	Smik_12.402	Skud_12.401	Suva_10.413	CAGL0A00847g	KAFR0A06600	KNAG0C05880	NCAS0J01020	NDAI0I02480	TBLA0G01400	---	---
---	---	TBLA0E01290	---	---	---	---	---	---	---	---	---	Kwal_47.17613	KLTH0E08470g	SAKL0H22770g	Ecym_1438	AFR494W	KLLA0C18381g	TDEL0D03180	ZYRO0G10846g	Anc_4.134	YLR318W	Smik_12.403	Skud_12.402	Suva_10.414	CAGL0A00869g	KAFR0A06610	KNAG0C05890	NCAS0J01010	NDAI0J01750	---	TPHA0K01500	Kpol_1062.49
---	---	---	---	---	---	---	---	---	---	---	---	Kwal_47.17617	KLTH0E08492g	SAKL0H22792g	Ecym_1439	AFR495C	KLLA0C18359g	TDEL0D03170	ZYRO0G10868g	Anc_4.135	YLR319C	Smik_12.404	Skud_12.403	Suva_10.415	CAGL0A00891g	KAFR0A06620	KNAG0C05900	NCAS0J01000	NDAI0J01740	TBLA0G01410	TPHA0K01490	Kpol_1062.48
Kpol_1025.32	TPHA0F00840	---	---	---	---	---	---	---	---	---	---	Kwal_47.17621	KLTH0E08514g	SAKL0H22814g	Ecym_1440	AFR496W	KLLA0C18337g	TDEL0D03160	ZYRO0G10890g	Anc_4.136	YLR320W	Smik_12.405	Skud_12.404	Suva_10.416	CAGL0A00913g	KAFR0A06630	KNAG0C05910	NCAS0J00990	NDAI0J01730	TBLA0G01420	---	---
---	---	---	---	---	---	---	---	---	---	---	---	---	---	---	---	---	---	---	---	---	---	---	---	---	---	---	KNAG0C05920	---	---	---	---	---
---	---	---	---	---	KNAG0B05510	---	CAGL0F08569g	---	---	---	---	Kwal_47.17608	KLTH0E08426g	SAKL0H22704g	Ecym_6181	AFR004W	KLLA0C18447g	TDEL0F02140	ZYRO0G10780g	Anc_4.131	YLR321C	Smik_12.406	Skud_12.405	Suva_10.417	CAGL0A00825g	KAFR0A06520	---	NCAS0J01030	NDAI0J01760	TBLA0G01390	TPHA0K01520	Kpol_1062.51
Kpol_1025.31	TPHA0F00850	TBLA0E01280	---	---	---	---	---	---	---	---	---	Kwal_47.17638	KLTH0E08580g	SAKL0H22880g	Ecym_1443	AFR499C	KLLA0C18260g	TDEL0D03130	ZYRO0G10956g	Anc_4.139	YLR323C	Smik_12.407	Skud_12.406	Suva_10.418	CAGL0A00935g	KAFR0A06640	KNAG0C05930	NCAS0J00980	NDAI0J01720	---	---	---
Kpol_1025.30	TPHA0F00860	TBLA0E01270	NDAI0K02550	NCAS0A05150	KNAG0D03380	KAFR0F03280	CAGL0F08657g	Suva_7.287	Skud_7.290	Smik_7.293	YGR004W	Kwal_47.17641	KLTH0E08602g	SAKL0H22902g	Ecym_1444	AFR500W	KLLA0C18238g	TDEL0D03120	ZYRO0G10978g	Anc_4.140	YLR324W	Smik_12.408	Skud_12.407	Suva_10.419	CAGL0A00957g	KAFR0A06650	KNAG0C05940	NCAS0J00970	NDAI0J01710	TBLA0G01450	---	Kpol_1062.44
---	---	---	---	---	KNAG0B05880	---	---	---	---	---	---	Kwal_55.20326	KLTH0E04334g	SAKL0B05082g	Ecym_2457	ABL011C	KLLA0B13112g	TDEL0E01710	ZYRO0B07854g	Anc_4.202	YLR362W	Smik_12.450	Skud_12.447	Suva_10.464	CAGL0B02739g	KAFR0A06190	---	NCAS0J00960	NDAI0J01990	TBLA0A08290	TPHA0B01010	Kpol_1042.20
---	---	---	---	---	KNAG0B05870	---	---	---	---	---	---	Kwal_55.20332	Kthe_YGOB_Anc_4.201	SAKL0B05060g	Ecym_2456	ABL010W	KLLA0B13123g	TDEL0E01720	ZYRO0B07876g	Anc_4.201	YLR361C-A	Smik_12.449	Skud_12.446	Suva_10.463	CAGL0B02755g	KAFR0A06200	---	NCAS0J00950	NDAI0J01980	TBLA0A08300	---	---
Kpol_2002.82	TPHA0I01050	---	NDAI0B00100	---	---	KAFR0F01870	---	Suva_6.230	Skud_10.64	Smik_10.83	YJL151C	Kwal_33.13926	KLTH0F05214g	SAKL0C05830g	---	---	---	TDEL0H00770	ZYRO0D02046g	Anc_1.197	---	---	---	---	---	---	KNAG0C02530	NCAS0J00940	---	---	---	---
---	---	---	---	---	---	---	---	---	---	---	---	---	---	---	---	---	---	---	---	---	---	---	---	---	---	---	---	NCAS0J00930	---	---	---	---
---	Missing in both copies (Post-WGD)
---	Missing in one copy (Post-WGD)
---	Missing (Pre-WGD)
---	Present (Pre-WGD)
---	S. cerevisiae copy
---	Synteny block 1 in N.dairenensis
---	Synteny block 1 in N.castellii
---	Synteny block 2 in N.dairenensis
---	Synteny block 2 in N.castellii

## Sheet: IML3
V.polyspora B	T.phaffii B	T.blattae B	N.dairenensis B	N.castellii B	K.naganishii B	K.africana B	C.glabrata B	S.uvarum B	S.kudriavzevii B	S.mikatae B	S.cerevisiae B	L.waltii	L.thermotolerans	L.kluyveri	E.cymbalariae	E.gossypii	K.lactis	T.delbrueckii	Z.rouxii	Ancestor	S.cerevisiae A	S.mikatae A	S.kudriavzevii A	S.uvarum A	C.glabrata A	K.africana A	K.naganishii A	N.castellii A	N.dairenensis A	T.blattae A	T.phaffii A	V.polyspora A
---	---	TBLA0A06600	NDAI0A05200	NCAS0A11100	KNAG0H00700	KAFR0H00960	CAGL0D01540g	Suva_16.390	Skud_16.348	Smik_16.304	YPR063C	Kwal_27.12610	KLTH0E15312g	SAKL0B07612g	Ecym_3475	ADL329W	KLLA0B08415g	TDEL0C04940	ZYRO0C16170g	Anc_3.352	---	---	---	---	---	---	---	---	---	---	TPHA0A03630	Kpol_1065.24
---	---	---	---	---	---	---	---	---	Skud_16.349	Smik_16.305	---	---	---	---	---	---	---	---	---	---	---	---	---	---	---	---	---	---	---	---	---	---
---	---	TBLA0A06590	NDAI0A05190	NCAS0A11110	---	---	---	---	---	---	---	Kwal_27.12613	KLTH0E15334g	SAKL0B07634g	Ecym_3474	ADL330W	KLLA0B09592g	TDEL0C04950	ZYRO0C16192g	Anc_3.353	YBR105C	Smik_2.245	Skud_2.231	Suva_4.351	CAGL0K12254g	KAFR0D02740	KNAG0B01550	NCAS0I01140	NDAI0A07860	---	TPHA0A03620	Kpol_1065.23
---	---	TBLA0A05830	---	NCAS0A00170	---	---	---	---	---	---	---	Kwal_YGOB_Kwal_33.13560	KLTH0F03366g	SAKL0C03806g	Ecym_3416	ADR144C	KLLA0D00440g	TDEL0C05760	ZYRO0C18216g	Anc_1.126	YJL208C	Smik_10.23	Skud_10.8	Suva_6.287	CAGL0I06336g	KAFR0F04400	KNAG0B01540	---	NDAI0F04650	---	TPHA0B04090	Kpol_2000.21
---	---	---	NDAI0A05180	NCAS0A11120	KNAG0H00720	KAFR0H00950	---	Suva_16.393	Skud_16.350	Smik_16.306	YPR065W	---	---	SAKL0B07656g	Ecym_3473	ADL331C	---	TDEL0C04960	ZYRO0C16214g	Anc_3.354	---	---	---	---	---	---	---	---	---	---	---	---
---	---	---	---	---	---	---	---	---	---	---	---	---	---	SAKL0B07678g	---	---	---	---	---	---	---	---	---	---	---	---	---	---	---	---	---	---
---	---	TBLA0H01600	NDAI0A05170	NCAS0A11130	KNAG0H00680	KAFR0H00940	---	---	---	---	---	Kwal_23.3744	KLTH0F10736g	SAKL0B07700g	Ecym_3472	ADL332C	KLLA0B09548g	TDEL0C04970	ZYRO0C16236g	Anc_3.355	YBR106W	Smik_2.246	Skud_2.232	Suva_4.352	CAGL0K12276g	KAFR0D02730	KNAG0B01530	NCAS0I01130	NDAI0A07870	---	TPHA0A03610	Kpol_1065.22
---	---	TBLA0H01590	NDAI0A05160	NCAS0A11140	KNAG0H00670	KAFR0H00930	CAGL0D01518g	Suva_16.394	Skud_16.351	Smik_16.307	YPR066W	Kwal_23.3741	KLTH0F10714g	SAKL0B07722g	Ecym_3471	ADL333C	KLLA0B09526g	TDEL0C04980	ZYRO0C16258g	Anc_3.356	---	---	---	---	---	---	---	---	---	---	TPHA0A03600	Kpol_1065.21
---	---	TBLA0H01580	NDAI0A05150	NCAS0A11150	KNAG0H00660	KAFR0H00920	CAGL0D01496g	Suva_16.395	Skud_16.352	Smik_16.308	YPR067W	Kwal_23.3740	KLTH0F10692g	SAKL0B07744g	Ecym_3470	ADL334C	KLLA0B09504g	TDEL0C04990	ZYRO0C16280g	Anc_3.357	---	---	---	---	---	---	KNAG0B01520	NCAS0I01120	NDAI0A07880	---	TPHA0A03590	Kpol_1065.20
---	---	---	---	---	---	---	---	---	---	---	---	---	---	---	---	---	---	---	---	---	---	---	---	---	---	---	---	---	NDAI0A07890	---	---	---
---	---	---	---	---	---	---	---	---	---	---	---	---	---	---	Ecym_3469	ADL335W	---	---	---	---	---	---	---	---	---	---	---	---	---	---	---	---
---	---	---	---	---	---	---	---	---	---	---	---	---	---	---	---	---	KLLA0B09482g	---	---	---	---	---	---	---	---	---	---	---	---	---	---	---
---	---	---	---	---	---	---	---	---	---	---	---	Kwal_23.3739	KLTH0F10670g	SAKL0B07766g	---	---	---	TDEL0C05000	ZYRO0C16302g	Anc_3.358	YBR107C	Smik_2.247	Skud_2.233	Suva_4.354	CAGL0K12298g	KAFR0D02720	KNAG0B01510	---	---	TBLA0B02410	TPHA0A03580	Kpol_1065.19
Kpol_376.13	---	TBLA0H01570	NDAI0A05140	NCAS0A11160	KNAG0H00650	KAFR0H00910	CAGL0D01474g	---	---	---	---	Kwal_23.3733	KLTH0F10648g	SAKL0B07788g	Ecym_3468	ADL336C	KLLA0B09460g	TDEL0C05010	ZYRO0C16324g	Anc_3.359	YBR108W	Smik_2.248	Skud_2.234	Suva_4.355	CAGL0K12320g	KAFR0D02710	KNAG0B01500	NCAS0I01110	NDAI0A07900	---	TPHA0A03570	---
Kpol_376.14	TPHA0M01580	TBLA0H01560	NDAI0A05130	NCAS0A11170	KNAG0H00640	KAFR0H00900	CAGL0D01452g	---	---	---	---	Kwal_23.3732	KLTH0F10626g	SAKL0B07810g	Ecym_3467	ADL337W	KLLA0B09427g	TDEL0C05020	ZYRO0C16346g	Anc_3.360	YBR109C	Smik_2.249	Skud_2.235	Suva_4.356	---	KAFR0D02700	KNAG0B01480	NCAS0I01100	---	TBLA0B02400	---	---
---	---	TBLA0H01550	---	---	---	---	---	---	---	---	---	Kwal_23.3727	KLTH0F10604g	SAKL0B07832g	Ecym_3466	ADL338C	KLLA0B09405g	TDEL0C05030	ZYRO0C16368g	Anc_3.361	YBR110W	Smik_2.250	Skud_2.236	Suva_4.357	CAGL0K12342g	KAFR0D02690	KNAG0B01470	NCAS0I01090	NDAI0A07910	---	TPHA0A03560	Kpol_1065.18
Kpol_376.15	TPHA0M01590	---	NDAI0A05120	NCAS0A11180	KNAG0H00630	KAFR0H00890	CAGL0D01430g	Suva_16.396	Skud_16.353	Smik_16.309	YPR068C	Kwal_23.3724	KLTH0F10582g	SAKL0B07854g	Ecym_3465	ADL339W	KLLA0B09394g	TDEL0C05040	ZYRO0C16390g	Anc_3.362	---	---	---	---	---	---	---	---	---	TBLA0B02390	---	---
---	---	TBLA0H01540	---	---	---	---	CAGL0D01408g	Suva_16.397	Skud_16.354	Smik_16.310	YPR069C	Kwal_23.3721	KLTH0F10560g	SAKL0B07876g	Ecym_3464	ADL340W	KLLA0B09372g	TDEL0C05050	ZYRO0C16412g	Anc_3.363	---	---	---	---	---	KAFR0D02680	KNAG0B01460	NCAS0I01080	NDAI0A07920	---	TPHA0A03550	Kpol_1065.17
Kpol_1005.8	---	---	---	---	---	---	---	---	---	---	---	Kwal_33.14339	KLTH0F07172g	SAKL0G09438g	---	AAL044C	KLLA0C14674g	TDEL0E02920	ZYRO0C14168g	Anc_5.334	YHR063C	Smik_8.134	Skud_8.120	Suva_15.252	CAGL0L10538g	KAFR0D02670	KNAG0B04630	NCAS0H01540	NDAI0C02070	TBLA0C05220	TPHA0G01030	Kpol_543.77
Kpol_376.16	TPHA0M01600	TBLA0H01530	NDAI0A05110	NCAS0A11190	KNAG0H00620	KAFR0H00880	CAGL0D01386g	Suva_16.398	Skud_16.355	Smik_16.311	YPR070W	Kwal_23.3680	KLTH0F10538g	SAKL0B07898g	Ecym_3463	ADL341C	KLLA0B09350g	TDEL0C05060	ZYRO0C16434g	Anc_3.364	---	---	---	---	---	---	---	---	---	---	---	---
---	---	---	---	---	---	---	---	Suva_16.399	Skud_16.356	Smik_16.312	YPR071W	---	---	---	---	---	---	---	---	---	---	---	---	---	---	---	---	---	---	---	---	---
---	---	---	---	---	---	---	---	---	Skud_16.357	---	---	---	---	---	---	---	---	---	---	---	---	---	---	---	---	---	---	---	---	---	---	---
---	---	---	---	---	---	---	---	---	Skud_16.358	---	---	---	---	---	---	---	---	---	---	---	---	---	---	---	---	---	---	---	---	---	---	---
---	---	---	---	---	---	---	---	---	Skud_16.359	---	---	---	---	---	---	---	---	---	---	---	---	---	---	---	---	---	---	---	---	---	---	---
---	---	---	---	---	---	---	---	---	---	Smik_16.313	---	---	---	---	---	---	---	---	---	---	---	---	---	---	---	---	---	---	---	---	---	---
---	Missing in both copies (Post-WGD)
---	Missing in one copy (Post-WGD)
---	Missing (Pre-WGD)
---	Present (Pre-WGD)
---	S. cerevisiae copy
---	Synteny block in N.dairenensis
---	Synteny block in N.castellii
---	Synteny block 2 in N.dairenensis
---	Synteny block 2 in N.castellii

## Sheet: CHL4
V.polyspora B	T.phaffii B	T.blattae B	N.dairenensis B	N.castellii B	K.naganishii B	K.africana B	C.glabrata B	S.uvarum B	S.kudriavzevii B	S.mikatae B	S.cerevisiae B	L.waltii	L.thermotolerans	L.kluyveri	E.cymbalariae	E.gossypii	K.lactis	T.delbrueckii	Z.rouxii	Ancestor	S.cerevisiae A	S.mikatae A	S.kudriavzevii A	S.uvarum A	C.glabrata A	K.africana A	K.naganishii A	N.castellii A	N.dairenensis A	T.blattae A	T.phaffii A	V.polyspora A
---	---	---	---	---	---	---	---	---	---	---	---	Kwal_55.19597	KLTH0E00616g	SAKL0H11528g	---	---	KLLA0B00429g	---	---	---	YNR058W	Smik_14.392	Skud_14.394	Suva_14.417	---	---	---	---	---	---	---	---
---	---	---	---	---	---	---	---	---	---	---	---	Kwal_55.19600	KLTH0E00594g	SAKL0H11506g	---	---	KLLA0B00407g	---	---	---	YNR057C	Smik_14.391	Skud_14.393	Suva_14.416	---	---	---	---	---	---	---	---
---	---	---	---	---	---	---	---	---	---	---	---	Kwal_55.19602	Kthe_YGOB_SAKL0H11484g	SAKL0H11484g	---	---	KLLA0B00385g	---	---	---	YNR056C	Smik_14.390	Skud_14.392	Suva_14.415	---	---	---	---	---	---	---	---
Kpol_1031.72	---	TBLA0A00340	NDAI0E03130	NCAS0C02440	KNAG0A02270	KAFR0H01510	CAGL0L12540g	Suva_16.279	Skud_16.244	Smik_16.198	YPL037C	Kwal_27.11821	KLTH0E11308g	SAKL0H11462g	Ecym_2535	AGL245C	KLLA0D11924g	TDEL0B01510	ZYRO0F08140g	Anc_8.485	YDR252W	Smik_4.499	Skud_4.514	Suva_2.418	---	KAFR0E02890	KNAG0A04040	NCAS0B02490	NDAI0C05200	---	TPHA0L01310	---
Kpol_1031.73	TPHA0C01760	TBLA0A00350	NDAI0E03120	NCAS0C02430	KNAG0A02260	KAFR0H01500	CAGL0L12562g	Suva_16.278	Skud_16.243	Smik_16.197	YPL038W	Kwal_27.11824	KLTH0E11330g	SAKL0H11440g	Ecym_2536	AGL246W	KLLA0D11902g	TDEL0B01500	ZYRO0F08162g	Anc_8.486	YDR253C	Smik_4.500	Skud_4.515	Suva_2.419	CAGL0B02651g	KAFR0E02900	KNAG0A04030	NCAS0B02480	NDAI0C05210	TBLA0A01605	TPHA0L01320	---
Kpol_1031.74	---	TBLA0A00360	NDAI0E03110	NCAS0C02420	KNAG0A02250	KAFR0H01490	CAGL0L12584g	Suva_16.277	Skud_16.242	Smik_16.196	YPL039W	---	---	SAKL0H11418g	Ecym_2537	---	KLLA0D11880g	---	ZYRO0F08184g	Anc_8.487	---	---	---	---	---	---	---	---	---	---	TPHA0L01330	---
Kpol_1031.75	---	---	NDAI0E03100	NCAS0C02410	KNAG0A02240	KAFR0H01480	CAGL0L12606g	Suva_16.276	Skud_16.241	Smik_16.195	YPL040C	Kwal_27.11827	KLTH0E11352g	SAKL0H11396g	Ecym_2538	AGL247C	KLLA0D11858g	TDEL0B01490	ZYRO0F08206g	Anc_8.488	---	---	---	---	---	---	---	---	---	TBLA0A01600	TPHA0L01340	---
---	---	---	---	---	---	---	---	---	---	---	---	---	---	---	---	---	---	---	ZYRO0F08228g	---	---	---	---	---	---	---	---	---	---	---	---	---
---	TPHA0C01750	TBLA0A00370	NDAI0E03090	NCAS0C02400	KNAG0A02230	KAFR0H01470	CAGL0L12628g	Suva_16.275	Skud_16.240	Smik_16.194	YPL041C	Kwal_27.11829	KLTH0E11374g	SAKL0H11374g	Ecym_2539	AGL248C	KLLA0D11836g	TDEL0B01480	ZYRO0F08250g	Anc_8.489	---	---	---	---	---	---	---	---	---	---	---	Kpol_193.2
Kpol_1031.76	---	TBLA0A01580	NDAI0E03080	NCAS0C02390	KNAG0A02220	KAFR0H01460	CAGL0L12650g	Suva_16.274	Skud_16.239	Smik_16.193	YPL042C	Kwal_27.11830	KLTH0E11396g	SAKL0H11352g	Ecym_2540	AGL249C	KLLA0D11814g	TDEL0B01470	ZYRO0F08272g	Anc_8.490	---	---	---	---	---	---	---	---	---	---	TPHA0L01350	---
---	---	---	---	---	---	---	---	Suva_16.272	---	---	---	---	---	---	---	---	---	---	---	---	---	---	---	---	---	---	---	---	---	---	---	---
---	TPHA0C01740	TBLA0A01570	NDAI0E03070	NCAS0C02380	KNAG0A02210	KAFR0H01450	CAGL0L12672g	Suva_16.271	Skud_16.238	Smik_16.192	YPL043W	Kwal_27.11832	KLTH0E11418g	SAKL0H11330g	Ecym_2541	AGL250W	KLLA0D11792g	TDEL0B01460	ZYRO0F08294g	Anc_8.491	---	---	---	---	---	---	---	---	---	---	---	Kpol_193.1
Kpol_1031.77	---	TBLA0A01560	---	---	---	---	---	---	---	---	---	Kwal_27.11838	KLTH0E11440g	SAKL0H11308g	Ecym_2542	AGL251C	KLLA0D11770g	TDEL0B01450	ZYRO0F08316g	Anc_8.492	YDR254W	Smik_4.501	Skud_4.516	Suva_2.420	CAGL0B02673g	KAFR0E02910	KNAG0A04020	---	---	---	TPHA0L01360	---
Kpol_333.9	TPHA0C01730	TBLA0A00380	NDAI0E03060	NCAS0C02370	KNAG0A02200	KAFR0H01440	CAGL0L12694g	Suva_16.270	Skud_16.237	Smik_16.191	YPL045W	Kwal_27.11839	KLTH0E11462g	SAKL0H11286g	Ecym_2543	AGL252W	KLLA0D11748g	TDEL0B01440	ZYRO0F08338g	Anc_8.493	---	---	---	---	---	---	---	---	---	---	---	---
Kpol_333.8	TPHA0C01720	TBLA0A00390	NDAI0E03050	NCAS0C02360	KNAG0A02190	KAFR0H01430	CAGL0L12716g	Suva_16.269	Skud_16.236	Smik_16.190	YPL046C	Kwal_27.11841	KLTH0E11484g	SAKL0H11264g	Ecym_2544	AGL253C	KLLA0D11726g	TDEL0B01430	ZYRO0F08360g	Anc_8.494	---	---	---	---	---	---	---	---	---	---	---	---
Kpol_333.7	TPHA0C01710	TBLA0A01550	---	---	---	---	---	---	---	---	---	Kwal_27.11842	KLTH0E11506g	SAKL0H11242g	Ecym_2545	AGL254W	KLLA0D11704g	TDEL0B01420	ZYRO0F08382g	Anc_8.495	YDR255C	Smik_4.502	Skud_4.517	Suva_2.421	CAGL0B02695g	KAFR0E02920	KNAG0A04010	NCAS0B02470	NDAI0C05220	---	---	---
Kpol_333.6	TPHA0C01700	TBLA0A00400	NDAI0E03040	NCAS0C02350	KNAG0A02180	KAFR0H01420	CAGL0L12738g	Suva_16.268	Skud_16.235	Smik_16.189	YPL047W	Kwal_27.11845	KLTH0E11528g	SAKL0H11220g	Ecym_2546	AGL255W	KLLA0D11682g	TDEL0B01410	ZYRO0F08404g	Anc_8.496	---	---	---	---	---	---	---	---	---	---	---	---
Kpol_333.5	TPHA0C01690	TBLA0A00410	---	---	---	---	---	---	---	---	---	Kwal_27.11847	KLTH0E11550g	SAKL0H11198g	Ecym_2547	AGL256W	KLLA0D11660g	TDEL0B01400	ZYRO0F08426g	Anc_8.497	YDR256C	Smik_4.503	Skud_4.518	Suva_2.422	CAGL0K10868g	KAFR0E02930	KNAG0A04000	NCAS0B02460	NDAI0C05230	---	---	---
---	---	---	---	---	---	KAFR0H00600	---	---	---	---	---	Kwal_55.19929	KLTH0E02156g	SAKL0G07062g	Ecym_5583	AEL225C	KLLA0A07084g	TDEL0A04830	ZYRO0A05654g	Anc_5.616	YDR257C	Smik_4.504	Skud_4.519	Suva_2.423	CAGL0M08844g	---	KNAG0C06190	NCAS0A08050	NDAI0H00910	TBLA0E03310	TPHA0D02870	Kpol_1018.68
---	---	---	NDAI0F00910	NCAS0G00810	KNAG0B03200	---	CAGL0H08195g	Suva_8.80	Skud_15.192	Smik_15.205	YOR027W	Kwal_55.19935	KLTH0E02178g	SAKL0G07084g	Ecym_5582	AEL224W	KLLA0A07062g	TDEL0A04840	ZYRO0A05676g	Anc_5.617	---	---	---	---	---	KAFR0C05890	---	---	---	TBLA0E03300	TPHA0D02880	Kpol_1018.69
---	---	---	---	---	---	KAFR0H00590	---	---	---	---	---	Kwal_55.19939	KLTH0E02200g	SAKL0G07106g	Ecym_5581	AEL223C	KLLA0E16897g	TDEL0A04850	ZYRO0G15818g	Anc_5.618	YDR258C	Smik_4.505	Skud_4.520	Suva_2.424	CAGL0M08822g	---	KNAG0C06200	NCAS0A08040	NDAI0H00900	TBLA0E03290	TPHA0D02890	Kpol_1018.70
---	---	---	---	---	---	---	---	---	---	---	---	---	---	---	---	---	---	---	ZYRO0G15840g	---	---	---	---	---	---	---	---	---	---	---	---	---
Kpol_495.17	TPHA0C00500	TBLA0J00790	NDAI0F00900	NCAS0G00800	KNAG0B03190	KAFR0H00580	---	Suva_8.81	Skud_15.193	Smik_15.206	YOR028C	Kwal_55.19947	KLTH0E02222g	SAKL0G07128g	Ecym_5580	AEL222C	KLLA0E16875g	---	---	Anc_5.619	YDR259C	Smik_4.506	Skud_4.521	Suva_2.425	CAGL0M08800g	KAFR0C05900	KNAG0C06210	NCAS0A08030	---	TBLA0E03280	TPHA0D02900	---
---	---	---	---	---	---	---	---	---	---	Smik_15.207	---	---	---	---	---	---	---	---	---	---	---	---	---	---	---	---	---	---	---	---	---	---
---	---	---	---	---	---	---	---	---	Skud_15.194	---	---	---	---	---	---	---	---	---	---	---	---	---	---	---	---	---	---	---	---	---	---	---
---	Missing in both copies (Post-WGD)
---	Missing in one copy (Post-WGD)
---	Missing (Pre-WGD)
---	Present (Pre-WGD)
---	S. cerevisiae copy
---	Synteny block 1 in N.dairenensis
---	Synteny block 1 in N.castellii
---	Synteny block 2 in N.dairenensis
---	Synteny block 2 in N.castellii

## Sheet: CNN1
V.polyspora B	T.phaffii B	T.blattae B	N.dairenensis B	N.castellii B	K.naganishii B	K.africana B	C.glabrata B	S.uvarum B	S.kudriavzevii B	S.mikatae B	S.cerevisiae B	L.waltii	L.thermotolerans	L.kluyveri	E.cymbalariae	E.gossypii	K.lactis	T.delbrueckii	Z.rouxii	Ancestor	S.cerevisiae A	S.mikatae A	S.kudriavzevii A	S.uvarum A	C.glabrata A	K.africana A	K.naganishii A	N.castellii A	N.dairenensis A	T.blattae A	T.phaffii A	V.polyspora A
Kpol_460.10	TPHA0E02480	---	---	---	---	---	---	---	---	---	---	Kwal_47.19204	KLTH0G01100g	SAKL0F01254g	Ecym_2580	AFR248C	KLLA0A01089g	TDEL0D06180	ZYRO0E09152g	Anc_3.550	YFR043C	Smik_7.363	Skud_6.134	Suva_12.14	CAGL0C02079g	KAFR0J00240	KNAG0D02900	NCAS0G00720	NDAI0B06220	TBLA0I03450	---	---
---	---	---	---	---	---	---	---	---	---	---	---	---	---	---	---	---	---	---	---	---	---	---	---	---	CAGL0C02057g	---	---	---	---	---	---	---
Kpol_YGOB_YGL230C	---	---	NDAI0I03140	NCAS0E00360	---	---	---	Suva_7.29	Skud_7.35	Smik_7.29	YGL230C	Kwal_YGOB_YGL230C	KLTH0G01078g	SAKL0F01232g	---	---	---	TDEL0D06190	ZYRO0E09174g	Anc_3.551	---	---	---	---	---	---	---	---	---	---	---	---
Kpol_460.11	TPHA0E02470	TBLA0E00320	NDAI0I03150	NCAS0E00350	KNAG0B00380	KAFR0J02790	CAGL0H07953g	Suva_7.28	Skud_7.34	Smik_7.28	YGL231C	Kwal_47.19210	KLTH0G01056g	SAKL0F01210g	Ecym_2581	AFR249W	KLLA0A01067g	TDEL0D06200	ZYRO0E09196g	Anc_3.552	---	---	---	---	---	---	---	---	---	---	---	---
Kpol_460.12	TPHA0E02460	TBLA0E00310	NDAI0I03160	NCAS0E00340	KNAG0B00370	KAFR0J02800	CAGL0H07931g	Suva_7.27	Skud_7.33	Smik_7.27	YGL232W	Kwal_47.19212	KLTH0G01034g	SAKL0F01188g	Ecym_2582	AFR250C	KLLA0A01045g	TDEL0D06210	ZYRO0E09218g	Anc_3.553	---	---	---	---	---	---	---	---	---	---	---	---
Kpol_460.13	TPHA0E02450	TBLA0E00290	NDAI0I03170	NCAS0E00330	KNAG0B00360	KAFR0J02810	CAGL0H07909g	Suva_7.26	Skud_7.32	Smik_7.26	YGL233W	Kwal_47.19214	KLTH0G01012g	SAKL0F01166g	Ecym_2583	AFR251C	KLLA0A01023g	TDEL0D06220	ZYRO0E09240g	Anc_3.554	---	---	---	---	---	---	---	---	---	---	---	---
---	---	---	---	---	---	---	---	---	---	---	---	---	---	SAKL0F01122g	---	---	---	---	---	---	---	---	---	---	---	---	---	---	---	---	---	---
Kpol_460.14	TPHA0N01240	---	---	---	---	---	---	---	---	---	---	Kwal_47.19220	KLTH0G00990g	SAKL0F01100g	---	AFR252C	KLLA0A01001g	TDEL0D06230	ZYRO0E09262g	Anc_3.555	YFR044C	Smik_7.364	Skud_6.135	Suva_12.13	CAGL0C02035g	KAFR0J00230	KNAG0D02910	NCAS0F03920	NDAI0B06230	TBLA0I03460	---	---
---	---	---	---	---	---	---	---	---	---	---	---	---	---	---	---	---	---	---	---	---	---	---	---	---	---	KAFR0J00220	---	---	---	---	---	---
Kpol_460.15	TPHA0N01250	TBLA0E00280	---	---	---	---	---	---	---	---	---	Kwal_47.19228	KLTH0G00968g	SAKL0F01078g	Ecym_2585	AFR253W	KLLA0A00979g	TDEL0D06240	ZYRO0E09284g	Anc_3.556	YFR045W	Smik_7.365	Skud_6.136	Suva_12.12	CAGL0C02013g	KAFR0J00210	KNAG0D02920	NCAS0F03930	NDAI0B06240	---	---	---
Kpol_460.16	TPHA0N01260	TBLA0E00270	NDAI0I03180	NCAS0E00320	KNAG0B00350	KAFR0J02820	CAGL0H07887g	Suva_7.25	Skud_7.31	Smik_7.25	YGL234W	Kwal_47.19231	KLTH0G00946g	SAKL0F01056g	Ecym_2586	AFR254C	KLLA0A00957g	TDEL0D06250	ZYRO0E09306g	Anc_3.557	---	---	---	---	---	---	---	---	---	---	---	---
---	---	---	NDAI0I03190	NCAS0E00310	KNAG0B00340	KAFR0J02830	CAGL0H07865g	Suva_7.24	Skud_7.30	Smik_7.24	YGL236C	Kwal_47.19236	KLTH0G00924g	SAKL0F01034g	Ecym_2587	AFR255W	KLLA0A00935g	TDEL0D06260	ZYRO0E09328g	Anc_3.558	---	---	---	---	---	---	---	---	---	TBLA0I03470	TPHA0A05970	Kpol_507.13
Kpol_460.17	TPHA0N01270	---	---	---	---	---	---	---	---	---	---	Kwal_47.19240	KLTH0G00902g	SAKL0F01012g	Ecym_2588	AFR256C	KLLA0A00913g	TDEL0D06270	ZYRO0E09350g	Anc_3.559	YFR046C	Smik_7.366	Skud_6.137	Suva_12.11	CAGL0C01991g	KAFR0J00200	KNAG0D02930	NCAS0F03940	NDAI0B06250	---	---	---
---	---	TBLA0E00260	NDAI0I03200	NCAS0E00300	KNAG0I00270	KAFR0J02840	CAGL0H07843g	Suva_7.23	Skud_7.29	Smik_7.23	YGL237C	Kwal_47.19244	KLTH0G00880g	SAKL0F00990g	Ecym_2589	AFR257W	KLLA0A00891g	TDEL0D06280	ZYRO0E09372g	Anc_3.560	---	---	---	---	---	---	---	---	---	---	TPHA0A05980	Kpol_507.12
Kpol_460.18	TPHA0N01280	---	NDAI0I03210	NCAS0E00290	KNAG0I00260	KAFR0J02850	CAGL0H07821g	Suva_7.22	Skud_7.28	Smik_7.22	YGL238W	Kwal_47.19247	KLTH0G00858g	SAKL0F00968g	Ecym_2590	AFR273W	KLLA0A00869g	TDEL0D06290	ZYRO0E09394g	Anc_3.561	---	---	---	---	---	---	---	---	---	TBLA0I03480	---	---
Kpol_460.19	TPHA0N01290	TBLA0E00250	NDAI0I03220	NCAS0E00280	KNAG0I00250	KAFR0J02860	CAGL0H07799g	Suva_7.21	Skud_7.27	Smik_7.21	YGL240W	Kwal_47.19253	KLTH0G00836g	SAKL0F00946g	Ecym_2591	AFR272W	KLLA0A00847g	TDEL0D06300	ZYRO0E09416g	Anc_3.562	---	---	---	---	---	---	---	---	---	---	---	---
Kpol_380.5	TPHA0G03620	---	---	---	---	---	---	---	---	---	---	Kwal_47.19256	KLTH0G00814g	SAKL0F00924g	Ecym_2592	AFR271W	---	TDEL0D06310	ZYRO0E09438g	Anc_3.563	YFR047C	Smik_7.367	Skud_6.138	Suva_12.10	---	---	---	---	NDAI0G00870	---	---	---
---	---	---	---	---	---	---	---	---	---	---	---	---	---	SAKL0F00902g	---	AFR270W	KLLA0A00825g	---	---	---	---	---	---	---	---	---	---	---	---	---	---	---
Kpol_380.6	TPHA0G03630	TBLA0E00240	---	---	---	---	CAGL0H07777g	Suva_7.20	Skud_7.26	Smik_7.20	YGL241W	Kwal_47.19258	KLTH0G00792g	SAKL0F00880g	Ecym_2594	AFR269W	KLLA0A00803g	TDEL0D06320	ZYRO0E09460g	Anc_3.564	---	---	---	---	---	KAFR0J00190	KNAG0D02940	NCAS0F03950	NDAI0B06260	---	---	---
---	---	---	---	---	---	---	CAGL0H07755g	Suva_7.19	Skud_7.25	Smik_7.19	YGL242C	Kwal_47.19262	KLTH0G00770g	SAKL0F00858g	Ecym_2595	AFR268C	KLLA0A00781g	TDEL0D06330	ZYRO0E09482g	Anc_3.565	---	---	---	---	---	KAFR0J00180	KNAG0D02950	NCAS0F03960	NDAI0B06270	TBLA0I03490	TPHA0A05990	Kpol_507.11
Kpol_380.7	TPHA0G03640	TBLA0E00230	NDAI0I03230	NCAS0E00270	KNAG0I00240	KAFR0J02870	CAGL0H07733g	Suva_7.18	Skud_7.24	Smik_7.18	YGL243W	Kwal_47.19263	KLTH0G00748g	SAKL0F00836g	Ecym_2596	AFR267W	KLLA0A00759g	TDEL0D06340	ZYRO0E09504g	Anc_3.566	---	---	---	---	---	---	---	---	---	---	---	---
---	---	TBLA0E00220	NDAI0I03240	NCAS0E00260	KNAG0I00230	KAFR0J02880	CAGL0H07711g	Suva_7.17	Skud_7.23	Smik_7.17	YGL244W	Kwal_47.19265	KLTH0G00726g	SAKL0F00814g	Ecym_2597	AFR266W	KLLA0A00737g	TDEL0D06350	ZYRO0E09526g	Anc_3.567	---	---	---	---	---	---	---	---	---	---	TPHA0A06000	Kpol_507.10
---	---	---	---	---	---	---	---	---	---	---	---	---	---	SAKL0F00792g	---	---	---	---	---	---	---	---	---	---	---	---	---	---	---	---	---	---
---	---	TBLA0E00210	---	---	---	---	---	---	---	---	---	Kwal_47.19268	KLTH0G00704g	SAKL0F00770g	Ecym_2598	AFR265C	KLLA0A00715g	TDEL0D06360	ZYRO0E09548g	Anc_3.568	YFR048W	Smik_7.368	Skud_6.139	Suva_12.9	CAGL0C01969g	KAFR0J00170	KNAG0D02960	NCAS0F03970	NDAI0B06280	---	TPHA0A06010	Kpol_507.9
---	---	TBLA0E00190	NDAI0I03250	NCAS0E00250	KNAG0I00220	KAFR0J02890	---	Suva_7.16	Skud_7.22	Smik_7.16	YGL245W	Kwal_47.19272	KLTH0G00682g	SAKL0F00748g	---	AFR264W	KLLA0A00682g	TDEL0D06370	ZYRO0E09570g	Anc_3.569	---	---	---	---	CAGL0C01947g	---	---	---	---	---	TPHA0A06020	Kpol_507.8
---	Missing in both copies (Post-WGD)
---	Missing in one copy (Post-WGD)
---	Missing (Pre-WGD)
---	Present (Pre-WGD)
---	S. cerevisiae copy
---	Synteny block 1 in T.blattae
---	Synteny block 2 in T.blattae

## Sheet: WIP1
V.polyspora B	T.phaffii B	T.blattae B	N.dairenensis B	N.castellii B	K.naganishii B	K.africana B	C.glabrata B	S.uvarum B	S.kudriavzevii B	S.mikatae B	S.cerevisiae B	L.waltii	L.thermotolerans	L.kluyveri	E.cymbalariae	E.gossypii	K.lactis	T.delbrueckii	Z.rouxii	Ancestor	S.cerevisiae A	S.mikatae A	S.kudriavzevii A	S.uvarum A	C.glabrata A	K.africana A	K.naganishii A	N.castellii A	N.dairenensis A	T.blattae A	T.phaffii A	V.polyspora A
---	---	---	---	---	---	---	---	---	---	---	---	Kwal_55.21402	KLTH0F15906g	SAKL0G02684g	Ecym_4512	ACL166W	KLLA0E02333g	TDEL0D02600	ZYRO0F10186g	Anc_5.441	YDR371W	Smik_4.637	Skud_4.640	Suva_2.543	CAGL0A02904g	KAFR0E03810	KNAG0C04870	NCAS0F03420	NDAI0B05710	TBLA0A02790	TPHA0E01720	Kpol_1062.25
Kpol_1016.2	TPHA0J02610	TBLA0A06480	---	NCAS0H02090	KNAG0B04200	KAFR0D05060	---	---	---	---	---	Kwal_55.21399	KLTH0F15884g	SAKL0G02706g	Ecym_4513	ACL165C	KLLA0E02355g	TDEL0D02590	ZYRO0F10208g	Anc_5.442	YDR372C	Smik_4.638	Skud_4.641	Suva_2.544	CAGL0A02926g	---	---	NCAS0F03430	NDAI0B05720	TBLA0A02780	---	Kpol_1062.24
---	---	---	---	---	---	---	---	---	---	---	---	---	---	---	---	---	---	---	---	---	---	---	---	---	---	---	---	---	NDAI0B05730	---	---	---
Kpol_1016.1	TPHA0J02620	TBLA0A06470	NDAI0C01550	NCAS0H02100	KNAG0B04190	KAFR0D05070	CAGL0K10252g	Suva_8.176	Skud_15.286	Smik_15.301	YOR124C	Kwal_55.21393	KLTH0F15862g	SAKL0G02728g	Ecym_4514	ACL164C	KLLA0E02377g	TDEL0D02580	ZYRO0G01606g	Anc_5.443	---	---	---	---	---	---	---	---	---	---	TPHA0E01710	Kpol_1062.23
---	---	---	---	---	---	---	---	---	---	---	---	---	KLTH0F15840g	---	---	---	---	---	---	---	---	---	---	---	---	---	---	---	---	---	---	---
---	---	---	---	---	---	---	---	---	---	---	---	---	KLTH0F15818g	---	---	---	---	---	---	---	---	---	---	---	---	---	---	---	---	---	---	---
---	---	---	---	---	---	---	---	---	---	---	---	Kwal_55.21391	KLTH0F15796g	SAKL0G02750g	Ecym_4515	ACL163W	KLLA0E02399g	TDEL0D02570	ZYRO0G01628g	Anc_5.444	YDR373W	Smik_4.639	Skud_4.642	Suva_2.545	CAGL0A02948g	KAFR0E03800	KNAG0C04860	NCAS0F03440	NDAI0B05740	TBLA0A02770	TPHA0E01700	Kpol_1062.22
---	---	---	---	---	---	---	---	---	---	---	---	---	---	---	---	---	---	---	---	---	---	Smik_4.640	---	---	---	---	---	---	---	---	---	---
---	TPHA0J02630	---	NDAI0C01540	NCAS0H02110	KNAG0B04180	KAFR0D05080	CAGL0K10274g	Suva_8.177	Skud_15.287	Smik_15.302	YOR125C	Kwal_55.21390	KLTH0F15774g	SAKL0G02772g	Ecym_4516	ACL162C	KLLA0E02421g	TDEL0D02560	ZYRO0G01650g	Anc_5.445	---	---	---	---	---	---	---	---	---	TBLA0A02760	TPHA0E01690	Kpol_1062.21
---	---	---	---	---	---	---	---	---	---	---	---	Kwal_55.21386	KLTH0F15752g	SAKL0G02794g	Ecym_4517	ACL161C	KLLA0E02443g	TDEL0D02550	ZYRO0G01672g	Anc_5.446	YDR374C	Smik_4.641	Skud_4.643	Suva_2.546	CAGL0A02970g	KAFR0E03790	KNAG0C04850	NCAS0A11770	NDAI0A04520	TBLA0A02750	TPHA0E01680	Kpol_1062.20
---	---	---	---	---	---	---	---	---	---	---	---	---	---	---	---	---	---	---	---	---	---	---	---	---	---	---	---	---	---	TBLA0A02730	---	---
---	---	---	---	---	---	---	---	---	---	---	---	---	---	---	---	---	---	---	---	---	---	---	---	---	---	---	---	---	---	---	---	Kpol_1062.19
---	---	---	---	---	---	---	---	---	---	---	---	Kwal_YGOB_YDR374W-A	Kthe_YGOB_YDR374W-A	Sklu_YGOB_YDR374W-A	---	Agos_YGOB_YDR374W-A	KLLA0E02465g	TDEL0D02540	ZYRO0G01694g	Anc_5.447	YDR374W-A	Smik_4.642	Skud_4.644	Suva_2.547	Cgla_YGOB_YDR374W-A	---	---	NCAS0A11780	NDAI0A04510	---	TPHA0E01670	---
---	---	---	NDAI0C01530	NCAS0H02120	KNAG0B04170	KAFR0D05090	---	---	---	---	---	Kwal_55.21381	KLTH0F15730g	SAKL0G02816g	Ecym_4643	ACR200C	KLLA0E02487g	TDEL0D02530	ZYRO0G01716g	Anc_5.448	YDR375C	Smik_4.643	Skud_4.645	Suva_2.548	CAGL0A02992g	---	---	---	---	TBLA0A02720	TPHA0E01660	Kpol_1062.18
---	---	---	---	---	---	---	---	---	---	---	---	---	KLTH0F15708g	---	---	---	---	---	---	---	---	---	---	---	---	---	---	---	---	---	---	---
---	TPHA0J02640	---	NDAI0C01520	NCAS0H02130	KNAG0B04160	KAFR0D05100	CAGL0K10296g	Suva_8.178	Skud_15.288	Smik_15.303	YOR126C	Kwal_55.21379	KLTH0F15686g	SAKL0G02838g	Ecym_4642	ACR201C	KLLA0E02509g	TDEL0D02520	ZYRO0G01738g	Anc_5.449	---	---	---	---	---	---	---	---	---	TBLA0A02710	TPHA0E01650	Kpol_1062.17
---	---	---	---	---	---	---	---	---	---	---	---	Kwal_55.21376	KLTH0F15664g	SAKL0G02860g	Ecym_4641	ACR202W	KLLA0E02531g	TDEL0D02510	ZYRO0G01760g	Anc_5.450	YDR376W	Smik_4.644	Skud_4.646	Suva_2.549	CAGL0A03014g	KAFR0E03780	KNAG0C04840	NCAS0A11790	NDAI0A04500	TBLA0A02700	TPHA0E01640	Kpol_1062.16
Kpol_440.1	TPHA0J02650	TBLA0A06460	---	---	---	---	---	---	---	---	---	Kwal_YGOB_Anc_5.451	KLTH0F15642g	SAKL0G02882g	Ecym_4640	ACR203W	KLLA0E02553g	TDEL0D02500	ZYRO0G01782g	Anc_5.451	YDR377W	Smik_4.645	Skud_4.647	Suva_2.550	CAGL0A03036g	KAFR0E03770	KNAG0C04830	NCAS0A11800	NDAI0A04490	---	---	---
---	---	TBLA0A06450	---	---	---	---	---	---	---	---	---	Kwal_55.21374	KLTH0F15620g	SAKL0G02904g	Ecym_4639	ACR204C	KLLA0E02575g	TDEL0D02490	ZYRO0G01804g	Anc_5.452	YDR378C	Smik_4.646	Skud_4.648	Suva_2.551	CAGL0A03051g	KAFR0E03760	KNAG0C04820	NCAS0A11810	NDAI0A04480	---	TPHA0E01630	Kpol_1062.15
Kpol_440.2	TPHA0J02660	TBLA0A06440	NDAI0C01510	NCAS0H02140	KNAG0B04150	KAFR0D05110	CAGL0K10318g	Suva_8.179	Skud_15.289	Smik_15.305	YOR127W	Kwal_55.21368	KLTH0F15598g	SAKL0G02926g	Ecym_4638	ACR205W	KLLA0E02597g	TDEL0D02480	ZYRO0G04444g	Anc_5.453	YDR379W	Smik_4.647	Skud_4.649	Suva_2.552	CAGL0A03058g	KAFR0E03750	KNAG0C04810	---	NDAI0A04470	TBLA0A02690	TPHA0E01620	Kpol_1062.14
---	---	TBLA0A06430	---	---	---	---	---	---	---	---	---	Kwal_55.21366	KLTH0F15576g	SAKL0G02948g	Ecym_4637	ACR206C	KLLA0E02619g	TDEL0D02470	ZYRO0G04422g	Anc_5.454	YDR379C-A	Smik_4.648	Skud_4.650	Suva_2.553	CAGL0A03080g	KAFR0E03740	KNAG0C04800	NCAS0A11820	NDAI0A04460	---	TPHA0E01610	Kpol_1062.13
---	---	---	---	---	---	---	---	---	---	---	---	Kwal_55.21357	KLTH0F15554g	SAKL0G02970g	Ecym_4636	ACR207W	KLLA0E02641g	---	---	---	---	---	---	---	---	---	---	---	---	---	---	---
---	---	---	---	---	---	---	---	---	---	---	---	---	---	---	---	ACR208C	---	---	---	---	---	---	---	---	---	---	---	---	---	---	---	---
---	---	---	---	---	---	---	---	---	---	---	---	---	---	SAKL0G02992g	Ecym_4635	ACR209W	KLLA0E02663g	---	---	---	---	---	---	---	---	---	---	---	---	---	---	---
Kpol_440.3	TPHA0J02670	---	NDAI0C01500	NCAS0H02150	KNAG0B04140	KAFR0D05120	CAGL0K10340g	Suva_8.180	Skud_15.290	Smik_15.306	YOR128C	Kwal_55.21353	KLTH0F15532g	SAKL0G03014g	Ecym_4634	ACR210C	KLLA0E02685g	TDEL0D02460	ZYRO0G04400g	Anc_5.455	---	---	---	---	---	---	---	---	---	TBLA0A02680	---	---
---	Missing in both copies (Post-WGD)
---	Missing in one copy (Post-WGD)
---	Missing (Pre-WGD)
---	Present (Pre-WGD)
---	S. cerevisiae copy
---	Synteny block 1
---	Synteny block 2

## Sheet: BIR1
V.polyspora B	T.phaffii B	T.blattae B	N.dairenensis B	N.castellii B	K.naganishii B	K.africana B	C.glabrata B	S.uvarum B	S.kudriavzevii B	S.mikatae B	S.cerevisiae B	L.waltii	L.thermotolerans	L.kluyveri	E.cymbalariae	E.gossypii	K.lactis	T.delbrueckii	Z.rouxii	Ancestor	S.cerevisiae A	S.mikatae A	S.kudriavzevii A	S.uvarum A	C.glabrata A	K.africana A	K.naganishii A	N.castellii A	N.dairenensis A	T.blattae A	T.phaffii A	V.polyspora A
---	TPHA0E00580	---	---	---	---	---	---	---	---	---	---	Kwal_23.4689	KLTH0F07722g	SAKL0F13904g	Ecym_4664	ACR179C	KLLA0E06227g	TDEL0C03160	ZYRO0G17248g	Anc_7.452	YJR084W	Smik_10.372	Skud_10.306	Suva_12.172	CAGL0M09251g	KAFR0G01020	KNAG0D01500	NCAS0E03070	NDAI0E04670	TBLA0I00830	---	Kpol_1010.22
Kpol_520.9	---	---	NDAI0A01270	---	KNAG0B02080	KAFR0K02180	Cgla_YGOB_Anc_7.453	Suva_16.367	Skud_16.325	Smik_16.282	YPR036W-A	Kwal_YGOB_Anc_7.453	Kthe_YGOB_Anc_7.453	Sklu_YGOB_Anc_7.453	Ecym_4665	ACR178C	Klac_YGOB_Anc_7.453	TDEL0C03170	Zrou_YGOB_Anc_7.453	Anc_7.453	---	---	---	---	---	---	---	NCAS0E03080	NDAI0E04680	TBLA0I00820	TPHA0B01440	---
---	---	---	---	---	---	---	---	---	---	---	---	Kwal_23.4686	KLTH0F07700g	SAKL0F13926g	Ecym_4666	ACR177W	KLLA0E06205g	TDEL0C03180	ZYRO0G17270g	Anc_7.454	YJR085C	Smik_10.373	Skud_10.307	Suva_12.173	CAGL0M09229g	KAFR0G01010	KNAG0D01490	NCAS0E03090	NDAI0E04690	---	---	---
---	TPHA0E00570	---	---	---	---	---	---	---	---	---	---	Kwal_33.14421	KLTH0F07678g	SAKL0F13948g	Ecym_4667	ACR176C	KLLA0E06183g	TDEL0C03190	ZYRO0G17292g	Anc_7.455	YJR086W	Smik_10.374	Skud_10.308	Suva_12.174	CAGL0M09207g	KAFR0G01000	KNAG0D01480	NCAS0H00660	NDAI0D00590	TBLA0I00810	---	Kpol_1010.21
Kpol_520.8	---	---	NDAI0A01260	NCAS0A14750	KNAG0B02070	KAFR0K02190	CAGL0K05401g	Suva_16.368	Skud_16.326	Smik_16.283	YPR037C	Kwal_33.14420	KLTH0F07656g	SAKL0F13970g	Ecym_4668	ACR175W	KLLA0E06161g	TDEL0C03200	ZYRO0G17314g	Anc_7.456	---	---	---	---	---	KAFR0G00990	KNAG0D01470	NCAS0H00650	NDAI0D00580	TBLA0I00800	TPHA0B01430	---
---	---	---	---	---	---	---	---	---	---	---	---	---	---	---	---	---	---	---	---	---	---	---	---	---	---	---	---	---	---	TBLA0I00790	---	---
---	---	---	---	---	---	---	---	---	---	---	---	---	---	---	---	---	---	---	---	---	---	---	---	---	---	---	---	---	---	TBLA0I00785	---	---
---	---	---	---	---	---	---	---	---	Skud_16.327	---	---	---	---	---	---	---	---	---	---	---	---	---	---	---	---	---	---	---	---	---	---	---
Kpol_520.7	---	TBLA0F00480	NDAI0A01250	NCAS0A14760	KNAG0F03450	KAFR0B00780	CAGL0K05423g	Suva_16.369	Skud_16.328	Smik_16.284	YPR040W	Kwal_33.14418	KLTH0F07634g	SAKL0F13992g	Ecym_4669	ACR174C	KLLA0E06139g	TDEL0C03210	ZYRO0G17336g	Anc_7.457	---	---	---	---	---	---	---	---	---	---	TPHA0B01420	---
Kpol_520.6	---	---	NDAI0J00710	NCAS0A14770	KNAG0F03460	KAFR0B00770	---	---	---	---	---	Kwal_33.14417	KLTH0F07612g	SAKL0F14014g	Ecym_4670	ACR173W	KLLA0E06117g	TDEL0C03220	ZYRO0G17358g	Anc_7.458	YJR088C	Smik_10.375	Skud_10.309	Suva_12.175	CAGL0M09185g	---	---	---	---	TBLA0I00780	TPHA0B01410	---
Kpol_520.5	---	---	NDAI0J00700	NCAS0A14780	KNAG0F03470	KAFR0B00760	CAGL0D03718g	Suva_16.370	Skud_16.329	Smik_16.285	YPR041W	Kwal_33.14412	KLTH0F07590g	SAKL0F14036g	Ecym_4671	AER400C	KLLA0E06095g	TDEL0C03230	ZYRO0G17380g	Anc_7.459	---	---	---	---	---	---	---	---	---	TBLA0I00770	TPHA0B01400	---
---	---	---	---	---	KNAG0F03480	---	---	---	---	---	---	---	---	---	---	---	---	---	---	---	---	---	---	---	---	---	---	---	---	---	---	---
Kpol_520.4	---	TBLA0F00490	---	---	---	---	---	---	---	---	---	Kwal_33.14405	KLTH0F07568g	SAKL0F14058g	Ecym_4672	AER399C	KLLA0E06073g	TDEL0C03240	---	Anc_7.460	YJR089W	Smik_10.376	Skud_10.310	Suva_12.176	---	KAFR0G00980	KNAG0D01460	NCAS0H00640	NDAI0D00570	---	TPHA0B01390	---
---	TPHA0E00560	---	---	---	---	---	---	---	---	---	---	Kwal_33.14400	KLTH0F07546g	SAKL0F14080g	Ecym_4673	AER398W	KLLA0E06051g	TDEL0C03250	ZYRO0G17424g	Anc_7.461	YJR090C	Smik_10.377	Skud_10.311	Suva_12.177	CAGL0M09130g	KAFR0G00970	KNAG0D01450	NCAS0H00630	NDAI0D00560	TBLA0I02490	---	Kpol_1010.20
Kpol_520.3	TPHA0E00550	---	NDAI0J00690	NCAS0A14790	KNAG0F03490	KAFR0B00740	CAGL0H08778g	Suva_16.372	Skud_16.330	Smik_16.286	YPR042C	Kwal_33.14395	KLTH0F07524g	SAKL0F14102g	Ecym_7153	AGL305W	KLLA0E06029g	TDEL0C03260	ZYRO0G17446g	Anc_7.462	YJR091C	Smik_10.378	Skud_10.312	Suva_12.178	CAGL0M09108g	KAFR0G00960	KNAG0D01440	NCAS0H00620	NDAI0D00550	TBLA0I02500	TPHA0B01380	Kpol_1010.19
---	---	---	---	---	---	---	---	Suva_16.373	---	---	---	---	---	---	---	---	---	---	---	---	---	---	---	---	---	---	---	---	---	---	---	---
---	---	---	---	---	---	---	CAGL0H08756g	---	---	---	---	---	---	---	---	---	---	---	---	---	---	---	---	---	---	---	---	---	---	---	---	---
---	TPHA0E00540	---	---	---	---	---	---	---	---	---	---	---	---	---	---	---	---	---	---	---	---	---	---	---	---	---	---	---	---	---	---	---
---	---	---	---	---	---	---	---	---	---	---	---	---	---	---	---	---	---	---	---	---	---	---	---	---	---	---	---	---	---	---	---	Kpol_1010.18
Kpol_520.2	---	---	NDAI0J00680	NCAS0A14800	KNAG0F03500	KAFR0B00730	---	---	---	---	---	Kwal_33.14380	KLTH0F07480g	SAKL0F14124g	Ecym_7154	AGL306C	KLLA0E06007g	TDEL0C03270	ZYRO0G17468g	Anc_7.463	YJR092W	Smik_10.379	Skud_10.313	Suva_12.179	CAGL0M09086g	KAFR0G00950	KNAG0D01430	NCAS0H00610	NDAI0D00540	TBLA0I02510	TPHA0B01370	Kpol_1010.17
---	TPHA0E00530	---	---	---	---	---	---	---	---	---	---	Kwal_33.14374	KLTH0F07458g	SAKL0F14146g	Ecym_7155	AGL307W	KLLA0E05985g	TDEL0C03280	ZYRO0G17490g	Anc_7.464	YJR093C	Smik_10.380	Skud_10.314	Suva_12.180	CAGL0M09064g	KAFR0G00940	KNAG0D01420	NCAS0H00600	NDAI0D00530	TBLA0I00760	---	Kpol_1010.16
---	---	---	---	---	---	---	---	---	---	---	---	---	---	---	---	---	---	---	ZYRO0G17512g	---	---	---	---	---	---	---	---	---	---	---	---	---
Kpol_520.1	---	---	---	---	---	---	---	---	---	---	---	Kwal_47.18209	KLTH0G05874g	SAKL0F14168g	Ecym_7156	AGL308W	KLLA0E05963g	TDEL0C03290	ZYRO0G17534g	Anc_7.465	YJR094C	Smik_10.381	Skud_10.315	Suva_12.181	CAGL0M09042g	---	KNAG0D01410	NCAS0H00590	NDAI0D00520	TBLA0I00750	TPHA0B01360	---
---	---	---	---	---	---	---	---	---	---	---	---	---	---	---	---	---	---	---	---	---	---	---	---	---	---	---	KNAG0D01400	---	---	---	---	---
---	---	---	---	---	---	---	---	---	---	---	---	---	---	SAKL0F14190g	---	---	---	---	---	---	---	---	---	---	---	---	---	---	---	---	---	---
---	Missing in both copies (Post-WGD)
---	Missing in one copy (Post-WGD)
---	Missing (Pre-WGD)
---	Present (Pre-WGD)
---	S. cerevisiae copy
---	Synteny block 1
---	Synteny block 2

## Sheet: FIN1
V.polyspora B	T.phaffii B	T.blattae B	N.dairenensis B	N.castellii B	K.naganishii B	K.africana B	C.glabrata B	S.uvarum B	S.kudriavzevii B	S.mikatae B	S.cerevisiae B	L.waltii	L.thermotolerans	L.kluyveri	E.cymbalariae	E.gossypii	K.lactis	T.delbrueckii	Z.rouxii	Ancestor	S.cerevisiae A	S.mikatae A	S.kudriavzevii A	S.uvarum A	C.glabrata A	K.africana A	K.naganishii A	N.castellii A	N.dairenensis A	T.blattae A	T.phaffii A	V.polyspora A
Kpol_1033.21	TPHA0C01030	TBLA0D04000	NDAI0B02570	NCAS0B05200	KNAG0G02210	KAFR0B02880	CAGL0M11528g	Suva_10.187	Skud_12.170	Smik_12.161	YLR102C	Kwal_56.23675	KLTH0G13002g	SAKL0H16324g	Ecym_4277	AGR070C	KLLA0F19800g	TDEL0F04180	ZYRO0D06490g	Anc_8.291	---	---	---	---	---	---	---	---	---	---	---	---
Kpol_1033.22	TPHA0C01020	TBLA0D03990	NDAI0B02580	NCAS0B05210	KNAG0G02220	KAFR0B02890	CAGL0M11550g	Suva_10.188	Skud_12.171	Smik_12.162	YLR103C	Kwal_56.23671	KLTH0G12980g	SAKL0H16302g	Ecym_4276	AGR071C	KLLA0F19822g	TDEL0F04190	ZYRO0D06468g	Anc_8.292	---	---	---	---	---	---	---	---	---	---	---	---
Kpol_1033.23	TPHA0C01010	---	NDAI0G02780	NCAS0C03450	KNAG0G02230	KAFR0B02900	CAGL0M11572g	Suva_10.189	Skud_12.172	Smik_12.163	YLR104W	Kwal_56.23670	KLTH0G12958g	SAKL0H16280g	Ecym_4275	AGR072W	KLLA0F19844g	TDEL0F04200	ZYRO0D06446g	Anc_8.293	---	---	---	---	---	---	---	---	---	TBLA0H01370	---	---
Kpol_1033.24	TPHA0C01000	TBLA0D03970	NDAI0G02760	NCAS0C03430	KNAG0G02250	KAFR0B02920	CAGL0M11616g	Suva_10.191	Skud_12.174	Smik_12.165	YLR106C	Kwal_56.23638	KLTH0G12892g	SAKL0H16214g	Ecym_4273	AGR074C	KLLA0F19888g	TDEL0F04220	ZYRO0D06380g	Anc_8.295	---	---	---	---	---	---	---	---	---	---	---	---
Kpol_1033.25	TPHA0C00990	TBLA0D03960	NDAI0G02750	NCAS0C03420	KNAG0G02260	KAFR0B02940	CAGL0M11638g	Suva_10.192	Skud_12.175	Smik_12.166	YLR107W	Kwal_56.23636	KLTH0G12870g	SAKL0H16192g	Ecym_4272	AGR052C	KLLA0F19910g	TDEL0F04230	ZYRO0D06358g	Anc_8.296	---	---	---	---	---	---	---	---	---	---	---	---
---	---	---	---	---	---	---	---	---	---	Smik_12.167	---	---	---	---	---	---	---	---	---	---	---	---	---	---	---	---	---	---	---	---	---	---
---	---	---	---	---	---	---	---	Suva_10.193	---	---	---	---	---	---	---	---	---	---	---	---	---	---	---	---	---	---	---	---	---	---	---	---
---	---	---	---	---	---	---	---	Suva_10.194	---	---	---	---	---	---	---	---	---	---	---	---	---	---	---	---	---	---	---	---	---	---	---	---
---	---	---	---	---	---	---	---	Suva_10.195	---	---	---	---	---	---	---	---	---	---	---	---	---	---	---	---	---	---	---	---	---	---	---	---
---	---	---	---	---	---	---	---	Suva_10.196	---	---	---	---	---	---	---	---	---	---	---	---	---	---	---	---	---	---	---	---	---	---	---	---
---	---	---	---	---	---	---	---	Suva_10.197	---	---	---	---	---	---	---	---	---	---	---	---	---	---	---	---	---	---	---	---	---	---	---	---
---	---	---	---	---	---	---	CAGL0M11660g	---	---	---	---	---	---	---	---	---	---	---	---	---	---	---	---	---	---	---	---	---	---	---	---	---
Kpol_1033.26	TPHA0C00980	---	---	---	---	---	---	---	---	---	---	Kwal_56.23633	KLTH0G12848g	SAKL0H16170g	Ecym_4271	AGR051W	KLLA0F19921g	TDEL0F04240	ZYRO0D06336g	Anc_8.297	YDR130C	Smik_4.376	Skud_4.391	Suva_2.293	CAGL0B02057g	KAFR0B05600	---	NCAS0B03670	NDAI0J01110	TBLA0H01360	---	---
---	---	TBLA0D03950	---	---	---	---	---	---	---	---	---	Kwal_56.23630	KLTH0G12826g	SAKL0H16148g	---	---	KLLA0F19943g	TDEL0F04250	ZYRO0D06314g	Anc_8.298	YDR131C	Smik_4.377	Skud_4.392	Suva_2.294	CAGL0L06468g	KAFR0B05610	KNAG0I01020	NCAS0B03440	NDAI0J01120	---	TPHA0A01650	Kpol_543.53
Kpol_1033.27	TPHA0C00970	TBLA0D03940	NDAI0G02740	NCAS0C03410	KNAG0G02270	KAFR0B02950	CAGL0M11682g	Suva_10.198	Skud_12.176	Smik_12.168	YLR108C	Kwal_YGOB_56.23628	KLTH0G12782g	SAKL0H16104g	Ecym_4270	AGR050W	KLLA0F19965g	TDEL0F04260	ZYRO0D06270g	Anc_8.299	YDR132C	Smik_4.378	Skud_4.393	Suva_2.295	CAGL0L06446g	KAFR0B05620	KNAG0I01010	NCAS0B03450	NDAI0J01130	---	---	---
Kpol_1004.59	TPHA0I01920	---	NDAI0G02730	NCAS0C03400	KNAG0G02280	KAFR0B02960	CAGL0M11704g	Suva_10.199	Skud_12.177	Smik_12.169	YLR109W	---	---	SAKL0H16082g	---	---	KLLA0F20009g	TDEL0F04270	ZYRO0D06248g	Anc_8.300	---	---	---	---	---	---	---	---	---	TBLA0H01350	---	---
---	---	TBLA0D03920	NDAI0G02720	NCAS0C03390	KNAG0G02290	KAFR0B02970	CAGL0M11726g	Suva_10.200	Skud_12.178	Smik_12.170	YLR110C	Kwal_56.23626	KLTH0G12760g	SAKL0H16060g	Ecym_4269	AGR049W	KLLA0F20031g	TDEL0F04280	ZYRO0D06204g	Anc_8.301	Scer_YGOB_YDR134C	Smik_4.379	Skud_4.394	Suva_2.296	CAGL0L06424g	KAFR0B05625	KNAG0I01000	NCAS0B03460	NDAI0J01140	TBLA0H01340	TPHA0A01640	Kpol_543.54
---	---	---	---	---	---	---	---	---	---	Smik_12.172	---	---	---	---	---	---	---	---	---	---	---	---	---	---	---	---	---	---	---	---	---	---
---	---	---	---	---	---	---	---	Suva_10.201	Skud_12.179	---	---	---	---	---	---	---	---	---	---	---	---	---	---	---	---	---	---	---	---	---	---	---
---	---	---	---	---	---	---	---	---	Skud_12.180	---	---	---	---	---	---	---	---	---	---	---	---	---	---	---	---	---	---	---	---	---	---	---
---	---	---	NDAI0G02710	---	---	---	---	---	---	---	---	---	---	---	---	---	---	---	---	---	---	---	---	---	---	---	---	---	---	---	---	---
---	---	---	---	---	---	---	---	---	---	---	---	---	---	---	Ecym_4268	---	---	---	---	---	---	---	---	---	---	---	---	---	---	---	---	---
---	---	---	---	---	---	---	---	---	---	---	---	---	---	---	Ecym_4267	---	---	---	---	---	---	---	---	---	---	---	---	---	---	---	---	---
---	---	---	NDAI0G02700	NCAS0C03380	KNAG0G02300	KAFR0B02980	CAGL0M11748g	Suva_10.202	Skud_12.181	Smik_12.173	YLR113W	Kwal_56.23841	KLTH0G12738g	SAKL0H16038g	Ecym_4266	AGR048C	KLLA0F20053g	TDEL0F04290	ZYRO0D06182g	Anc_8.302	---	---	---	---	---	---	---	---	---	TBLA0H01330	TPHA0A01630	Kpol_543.55
---	---	---	---	---	---	---	---	---	---	Smik_12.174	---	---	---	---	---	---	---	---	---	---	---	---	---	---	---	---	---	---	---	---	---	---
---	Missing in both copies (Post-WGD)
---	Missing in one copy (Post-WGD)
---	Missing (Pre-WGD)
---	Present (Pre-WGD)
---	S. cerevisiae copy
---	Synteny block 1
---	Synteny block 2

## Sheet: Sheet1
Gene name	N.castellii A	N.castellii B	N.dairenensis A	N.dairenensis B		Color Legend
NKP1	---	---	---	---		---	Missing in both copies (Post-WGD)
NKP2	---	---	---	---		---	Missing (Pre-WGD)
IML3	---	---	---	---			Two copies in Post-WGD
CHL4	---	---	---	---		---	Missing in one copy (Post-WGD)
CNN1	NCAS0F03940	---	NDAI0B06250	---			Present (Pre-WGD)
WIP1	NCAS0A11780	---	NDAI0A04510	---
Gene name	C.glabrata A	C.glabrata B	S.uvarum A	S.uvarum B	S.kudriavzevii A	S.kudriavzevii B	S.mikatae A	S.mikatae B	S.cerevisiae A	S.cerevisiae B
NKP1	CAGL0A03190g	---	Suva_2.558	---	Skud_4.655	---	Smik_4.653	---	YDR383C	---
NKP2	---	CAGL0F08591g	Suva_10.412	---	Skud_12.400	---	Smik_12.401	---	YLR315W	---
IML3	CAGL0K12298g	---	Suva_4.354	---	Skud_2.233	---	Smik_2.247	---	YBR107C	---
CHL4	CAGL0B02673g	---	Suva_2.420	---	Skud_4.516	---	Smik_4.501	---	YDR254W	---
CNN1	CAGL0C01991g	---	Suva_12.11	---	Skud_6.137	---	Smik_7.366	---	YFR046C	---
WIP1	Cgla_YGOB_YDR374W-A	---	Suva_2.547	---	Skud_4.644	---	Smik_4.642	---	YDR374W-A	---
Gene name	K.africana A	K.africana B	K.naganishii A	K.naganishii B	T.blattae A	T.blattae B	T.phaffii A	T.phaffii B	V.polyspora A	V.polyspora B
NKP1	KAFR0E03690	---	KNAG0C04700	---	TBLA0A08000	---	TPHA0E01560	---	Kpol_543.1	---
NKP2	KAFR0J01380	---	KNAG0C05870	---	---	---	TPHA0K01510	---	Kpol_1062.50	---
IML3	KAFR0D02720	---	KNAG0B01510	---	TBLA0B02410	---	TPHA0A03580	---	Kpol_1065.19	---
CHL4	KAFR0E02910	---	KNAG0A04020	---	---	TBLA0A01560	TPHA0L01360	---	---	Kpol_1031.77
CNN1	KAFR0J00200	---	KNAG0D02930	---	---	---	---	TPHA0N01270	---	Kpol_460.17
WIP1	---	---	---	---	---	---	TPHA0E01670	---	---	---
Gene name	L.waltii	L.thermotolerans	L.kluyveri	E.cymbalariae	E.gossypii	K.lactis	T.delbrueckii	Z.rouxii
NKP1	Kwal_55.21322	KLTH0F15356g	SAKL0G03190g	---	---	KLLA0E02883g	TDEL0A03270	ZYRO0B02420g
NKP2	Kwal_47.17609	Kthe_YGOB_Anc_4.132	SAKL0H22726g	---	---	KLLA0C18425g	TDEL0D03200	ZYRO0G10802g
IML3	Kwal_23.3739	KLTH0F10670g	SAKL0B07766g	---	---	---	TDEL0C05000	ZYRO0C16302g
CHL4	Kwal_27.11838	KLTH0E11440g	SAKL0H11308g	Ecym_2542	AGL251C	KLLA0D11770g	TDEL0B01450	ZYRO0F08316g
CNN1	Kwal_47.19240	KLTH0G00902g	SAKL0F01012g	Ecym_2588	AFR256C	KLLA0A00913g	TDEL0D06270	ZYRO0E09350g
WIP1	Kwal_YGOB_YDR374W-A	Kthe_YGOB_YDR374W-A	Sklu_YGOB_YDR374W-A	---	Agos_YGOB_YDR374W-A	KLLA0E02465g	TDEL0D02540	ZYRO0G01694g
